# Supplementary material for: Effects of the alkyl substituent in the π-donor heteroatom on the kinetic and thermodynamic acidities of Fischer thiocarbene complexes
Source: Royal Society of Chemistry journal article supplement (doi:10.1039/b709504j), 2007-08-28

Supporting Information

Effects of the alkyl substituent in the  $\pi$ -donor  
heteroatom on the kinetic and thermodynamic acidities  
of Fischer thiocarbene complexes.

*Martin E. Zoloff Michoff, Diego M. Andrada, Rita H. de Rossi\* and Alejandro M. Granados\**

Instituto de Investigaciones en Fisicoquímica de Córdoba, Departamento de Química Orgánica,  
Facultad de Ciencias Químicas, Universidad Nacional de Córdoba, Ciudad Universitaria, Córdoba,  
Argentina.

[ale@mail.fcq.unc.edu.ar](mailto:ale@mail.fcq.unc.edu.ar), [ritah@mail.fcq.unc.edu.ar](mailto:ritah@mail.fcq.unc.edu.ar)

**Table of Contents**

|    |                                                                                                |
|----|------------------------------------------------------------------------------------------------|
| S1 | <b>Figure S1.</b> Plots for the proton transfer reaction of KOH with <b>5-Cr-R<sub>1</sub></b> |
| S3 | <b>Table S1.</b> Reaction of <b>5-W-<i>i</i>Pr</b> with morpholine buffers.                    |
| S5 | <sup>1</sup> H NMR, <sup>13</sup> C NMR and IR spectra for <b>5-M-R<sub>1</sub></b> .          |

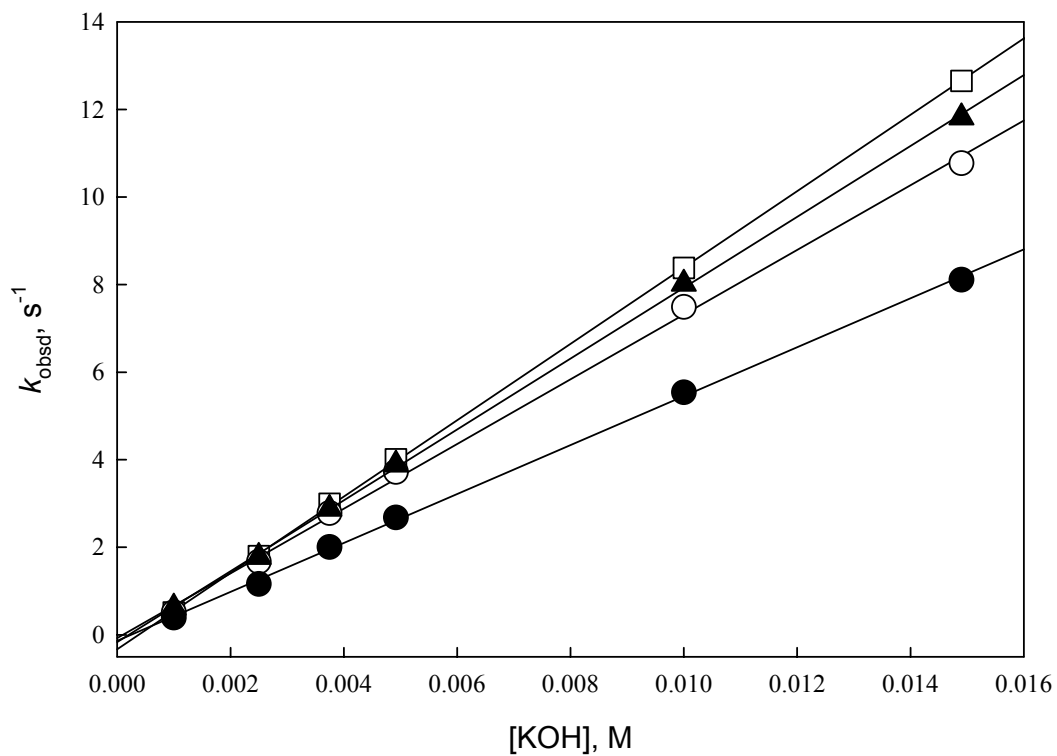

**Figure S1.** Plots for the proton transfer reaction from **5-Cr-*t*Pr** (□), **5-Cr-*t*But** (▲), **5-Cr-*n*But** (○) and **5-Cr-*c*Hex** (●) to KOH.

**Table S1.** Reaction of **5-W-iPr** with morpholine buffers.<sup>a</sup>

| pH   | [Buffer], M | $k_{\text{obsd}}, \text{s}^{-1 \text{ b}}$ |
|------|-------------|--------------------------------------------|
| 7.80 | 0.0250      | $15.90 \pm 0.05$                           |
|      | 0.0375      | $21.34 \pm 0.07$                           |
|      | 0.0500      | $27.9 \pm 0.1$                             |
|      | 0.0625      | $34.2 \pm 0.2$                             |
|      | 0.0750      | $40.1 \pm 0.4$                             |
|      | 0.0875      | $47.0 \pm 0.3$                             |
|      | 0.100       | $53.4 \pm 0.8$                             |
| 8.30 | 0.0125      | $6.90 \pm 0.04$                            |
|      | 0.0250      | $13.27 \pm 0.06$                           |
|      | 0.0375      | $20.11 \pm 0.07$                           |
|      | 0.0500      | $26.6 \pm 0.1$                             |
|      | 0.0625      | $32.9 \pm 0.2$                             |
|      | 0.0750      | $39.7 \pm 0.2$                             |
|      | 0.1000      | $50.8 \pm 0.6$                             |
| 8.50 | 0.0125      | $6.78 \pm 0.03$                            |
|      | 0.0250      | $13.38 \pm 0.06$                           |
|      | 0.0375      | $19.23 \pm 0.07$                           |
|      | 0.0500      | $26.5 \pm 0.2$                             |
|      | 0.0625      | $32.8 \pm 0.2$                             |
|      | 0.0750      | $39.5 \pm 0.5$                             |
|      | 0.1000      | $51.6 \pm 0.7$                             |
| 8.88 | 0.0125      | $6.46 \pm 0.03$                            |
|      | 0.0250      | $13.02 \pm 0.09$                           |
|      | 0.0375      | $19.1 \pm 0.1$                             |
|      | 0.0500      | $26.5 \pm 0.1$                             |
|      | 0.0625      | $33.8 \pm 0.1$                             |
|      | 0.0750      | $40.5 \pm 0.3$                             |

| pH   | [Buffer], M | $k_{\text{obsd}}, \text{S}^{-1\text{b}}$ |
|------|-------------|------------------------------------------|
|      | 0.1000      | $54.7 \pm 0.4$                           |
| 9.00 | 0.0125      | $6.34 \pm 0.04$                          |
|      | 0.0250      | $13.0 \pm 0.1$                           |
|      | 0.0375      | $18.86 \pm 0.08$                         |
|      | 0.0500      | $25.82 \pm 0.07$                         |
|      | 0.0625      | $32.44 \pm 0.07$                         |
|      | 0.0750      | $38.54 \pm 0.09$                         |
|      | 0.1000      | $51.2 \pm 0.2$                           |
| 9.27 | 0.0125      | $6.10 \pm 0.02$                          |
|      | 0.0250      | $13.01 \pm 0.08$                         |
|      | 0.0375      | $19.85 \pm 0.09$                         |
|      | 0.0500      | $26.45 \pm 0.09$                         |
|      | 0.0625      | $32.47 \pm 0.09$                         |
|      | 0.0750      | $38.62 \pm 0.09$                         |
|      | 0.1000      | $49.0 \pm 0.4$                           |
| 9.40 | 0.0125      | $6.30 \pm 0.07$                          |
|      | 0.0250      | $12.8 \pm 0.2$                           |
|      | 0.0375      | $19.4 \pm 0.2$                           |
|      | 0.0500      | $25.1 \pm 0.2$                           |
|      | 0.0625      | $32.2 \pm 0.2$                           |
|      | 0.0750      | $37.9 \pm 0.3$                           |
|      | 0.1000      | $51.8 \pm 0.6$                           |

<sup>a</sup>Acetonitrile:Water (1:1 V/V), 25°C,  $\mu = 0.1 \text{ M (KCl)}$ ,  $[\mathbf{5-W-iPr}] = 1.00 \times 10^{-4} \text{ M}$ . <sup>b</sup> Monitored at 436 nm in a stopped-flow apparatus.

### Characterization of the Fischer carbene complexes.

**5-Cr-*n*Bu:**  $^1\text{H}$  NMR  $\delta$  0.97 (t, 3H,  $\text{SCH}_2\text{CH}_2\text{CH}_2\text{CH}_3$ ), 1.52 – 1.41 (m, 2H,  $\text{SCH}_2\text{CH}_2\text{CH}_2\text{CH}_3$ ), 1.74 – 1.62 (m, 2H,  $\text{SCH}_2\text{CH}_2\text{CH}_2\text{CH}_3$ ), 3.16 (t, 2H,  $\text{SCH}_2\text{CH}_2\text{CH}_2\text{CH}_3$ ), 3.56 (s, 3H,  $\text{CH}_3$ ).  $^{13}\text{C}$  NMR  $\delta$  13.5 ( $\text{SCH}_2\text{CH}_2\text{CH}_2\text{CH}_3$ ), 21.9 ( $\text{SCH}_2\text{CH}_2\text{CH}_2\text{CH}_3$ ), 29.1 ( $\text{SCH}_2\text{CH}_2\text{CH}_2\text{CH}_3$ ), 42.3 ( $\text{SCH}_2\text{CH}_2\text{CH}_2\text{CH}_3$ ), 45.8 ( $\text{CH}_3$ ), 216.3 (CO, equatorial), 227.2 (CO, axial), 366.4 (C=). FT IR ( $\text{cm}^{-1}$ ) 2971.4 w, 2940.9 w, 2874.7 w, 2065.1 m, 1932.7 s, 1118.0 w, 781.9 w, 659.7 w, 456.0 w. UV-vis (50% MeCN – 50% Water):  $\lambda_{\text{max}} = 450 \text{ nm}$  ( $\epsilon \approx 11330 \text{ M}^{-1}\text{cm}^{-1}$ ). These values compare well with the ones reported in the literature.<sup>64</sup>

**5-Cr-*i*Pr:**  $^1\text{H}$  NMR  $\delta$  1.34– 1.38 (d, 6H,  $\text{SCH}(\text{CH}_3)_2$ ), 3.62 (s, 3H,  $\text{CH}_3$ ), 3.88 – 4.02 (m, 1H,  $\text{SCH}(\text{CH}_3)_2$ ).  $^{13}\text{C}$  NMR  $\delta$  21.6 ( $\text{SCH}(\text{CH}_3)_2$ ), 45.2 ( $\text{SCH}(\text{CH}_3)_2$ ), 45.7 ( $\text{CH}_3$ ), 216.3 (CO, equatorial), 227.2 (CO, axial), 364.5 (C=). FT IR ( $\text{cm}^{-1}$ ) 2986.7 w, 2930.7 w, 2869.6 w, 2060.0 m, 1993.8 m, 1932.7 s, 1240.4 w, 771.7 w, 649.5 w, 456.0 w. UV-vis (50% MeCN – 50% Water):  $\lambda_{\text{max}} = 451 \text{ nm}$  ( $\epsilon \approx 9370 \text{ M}^{-1}\text{cm}^{-1}$ ). HRMS (nitrobenzyl alcohol): calcd for  $\text{C}_{10}\text{H}_{10}\text{CrO}_5\text{S}$  293.9654, obtained 293.9643.

**5-Cr-*t*Bu:**  $^1\text{H}$  NMR  $\delta$  1.54 (s, 9H,  $(\text{SC}(\text{CH}_3)_3)$ ), 3.80 (s, 3H,  $\text{CH}_3$ ).  $^{13}\text{C}$  NMR  $\delta$  30.0 ( $(\text{SC}(\text{CH}_3)_3)$ ), 46.2 ( $(\text{SC}(\text{CH}_3)_3)$ ), 60.7 ( $\text{CH}_3$ ), 216.4 (CO, equatorial), 227.1 (CO, axial), 368.0 (C=). FT-IR ( $\text{cm}^{-1}$ ) 2971.4 w, 2065.1 m, 1998.9 m, 1907.2 s, 1474.4 w, 1168.9 w, 1123.1 w, 1056.9 w, 751.3 w, 659.7 m, 537.0 w. UV-vis (50% MeCN – 50% Water):  $\lambda_{\text{max}} = 457 \text{ nm}$  ( $\epsilon \approx 6260 \text{ M}^{-1}\text{cm}^{-1}$ ). HRMS (nitrobenzyl alcohol): calcd for  $\text{C}_{11}\text{H}_{12}\text{CrO}_5\text{S}$  307.9811, obtained 307.9807.

**5-Cr-*c*Hex:**  $^1\text{H}$  NMR  $\delta$  1.32 – 1.97 (m, 11H,  $\text{SC}_6\text{H}_{11}$ ), 3.60 (s, 3H,  $\text{CH}_3$ ).  $^{13}\text{C}$  NMR  $\delta$  25.1, 25.6, 31.5, 45.1 ( $\text{SC}_6\text{H}_{11}$ ), 54.0 ( $\text{CH}_3$ ), 216.3 (CO, equatorial), 227.2 (CO, axial), 364.3 (C=). FT-IR ( $\text{cm}^{-1}$ ) 2930.7 s, 2859.4 s, 2075.2 m, 1942.9 s, 1454 m, 1265.6 m, 990.7 m, 859.7 m, 659.9 w. UV-vis (50% MeCN – 50% Water):  $\lambda_{\text{max}} = 450 \text{ nm}$  ( $\epsilon \approx 7520 \text{ M}^{-1}\text{cm}^{-1}$ ).

**5-W-*n*Bu:**  $^1\text{H}$  NMR  $\delta$  0.97 (t, 3H,  $\text{SCH}_2\text{CH}_2\text{CH}_2\text{CH}_3$ ), 1.44 – 1.50 (m, 2H,  $\text{SCH}_2\text{CH}_2\text{CH}_2\text{CH}_3$ ), 1.67 – 1.73 (m, 2H,  $\text{SCH}_2\text{CH}_2\text{CH}_2\text{CH}_3$ ), 3.00 (t, 2H,  $\text{SCH}_2\text{CH}_2\text{CH}_2\text{CH}_3$ ), 3.37 (s, 3H,  $\text{CH}_3$ ).  $^{13}\text{C}$  NMR  $\delta$  13.6 ( $\text{SCH}_2\text{CH}_2\text{CH}_2\text{CH}_3$ ), 22.0 ( $\text{SCH}_2\text{CH}_2\text{CH}_2\text{CH}_3$ ), 28.7 ( $\text{SCH}_2\text{CH}_2\text{CH}_2\text{CH}_3$ ), 42.8 ( $\text{SCH}_2\text{CH}_2\text{CH}_2\text{CH}_3$ ), 47.8 ( $\text{CH}_3$ ), 197.7 (CO, equatorial), 207.4 (CO, axial), 332.3 (C=). FT IR ( $\text{cm}^{-1}$ ) 2962.4 w, 2914.9 w,

2067.3 m, 1940.6 s, 1263.4 w, 1093.1 w, 1017.8 w, 942.6 w, 887.1 w, 804.0 w, 570.3 w. UV-vis (50% MeCN – 50% Water):  $\lambda_{\max} = 435 \text{ nm}$  ( $\epsilon \approx 10779 \text{ M}^{-1}\text{cm}^{-1}$ ). HRMS (nitrobenzyl alcohol): calcd for  $\text{C}_{11}\text{H}_{12}\text{O}_5\text{SW}$  440.9988, obtained 440.9981.

**5-W-*i*Pr:**  $^1\text{H}$  NMR  $\delta$  1.37– 1.39 (d, 6H,  $\text{SCH}(\text{CH}_3)_2$ ), 3.44 (s, 3H,  $\text{CH}_3$ ), 3.75 – 3.86 (m, 1H,  $\text{SCH}(\text{CH}_3)_2$ ).  $^{13}\text{C}$  NMR  $\delta$  21.3 ( $\text{SCH}(\text{CH}_3)_2$ ), 46.4 ( $\text{SCH}(\text{CH}_3)_2$ ), 47.2 ( $\text{CH}_3$ ), 197.7 (CO, equatorial), 207.3 (CO, axial), 330.5 (C=). FT IR ( $\text{cm}^{-1}$ ) 2976.4 w, 2064.9 m, 1980.1 m, 1936.6 s, 1338.4 w, 1238.5 w, 1108.3, 1041.7 w, 764.4 w, 598.0 w, 570.3 w, 423.8 w. UV-vis (50% MeCN – 50% Water):  $\lambda_{\max} = 436 \text{ nm}$  ( $\epsilon \approx 11500 \text{ M}^{-1}\text{cm}^{-1}$ ). HRMS (nitrobenzyl alcohol): calcd for  $\text{C}_{10}\text{H}_{10}\text{O}_5\text{SW}$  426.9831, obtained 426.9812.

**5-W-*t*Bu:**  $^1\text{H}$  NMR  $\delta$  1.56 (s, 9H, ( $\text{SC}(\text{CH}_3)_3$ )), 3.64 (s, 3H,  $\text{CH}_3$ ).  $^{13}\text{C}$  NMR  $\delta$  29.8 ( $\text{SC}(\text{CH}_3)_3$ ), 48.0 ( $\text{SC}(\text{CH}_3)_3$ ), 61.6 ( $\text{CH}_3$ ), 197.3 (CO, equatorial), 207.2 (CO, axial), 334.5 (C=). FT-IR ( $\text{cm}^{-1}$ ) 2998.0 w, 2958.4 w, 2067.3 m, 1992.1 m, 1956.4 s, 1928.7 s, 1897.0 s, 1370.3 w, 1342.6 w, 1156.4 w, 1116.8 w, 1069.3 w, 934.7 w, 764.4 m, 594.1 m, 578.2 m. UV-vis (50% MeCN – 50% Water):  $\lambda_{\max} = 441 \text{ nm}$  ( $\epsilon \approx 14627 \text{ M}^{-1}\text{cm}^{-1}$ ). HRMS (nitrobenzyl alcohol): calcd for  $\text{C}_{11}\text{H}_{12}\text{O}_5\text{SW}$  440.9988, obtained 440.9978.

**5-W-*c*Hex:**  $^1\text{H}$  NMR  $\delta$  1.31 – 2.08 (m, 11H,  $\text{SC}_6\text{H}_{11}$ ), 3.43 (s, 3H,  $\text{CH}_3$ ).  $^{13}\text{C}$  NMR  $\delta$  25.1, 25.6, 31.2, 47.1 ( $\text{SC}_6\text{H}_{11}$ ), 54.4 ( $\text{CH}_3$ ), 197.7 (CO, equatorial), 207.3 (CO, axial), 330.3 (C=). FT IR ( $\text{cm}^{-1}$ ) 2935.8 w, 2859.4 w, 2080.3 m, 1988.7 m, 1932.3 s, 1917.4 s, 1895.1 s, 1443.8 w, 1102.7 w, 776.8 m, 593.5 m, 573.5 m. UV-vis (50% MeCN-50% Water):  $\lambda_{\max} = 437$  ( $\epsilon \approx 11954 \text{ M}^{-1}\text{s}^{-1}$ ). HRMS (nitrobenzyl alcohol): calcd for  $\text{C}_{13}\text{H}_{14}\text{O}_5\text{SW}$  467.0144, obtained 467.0147.

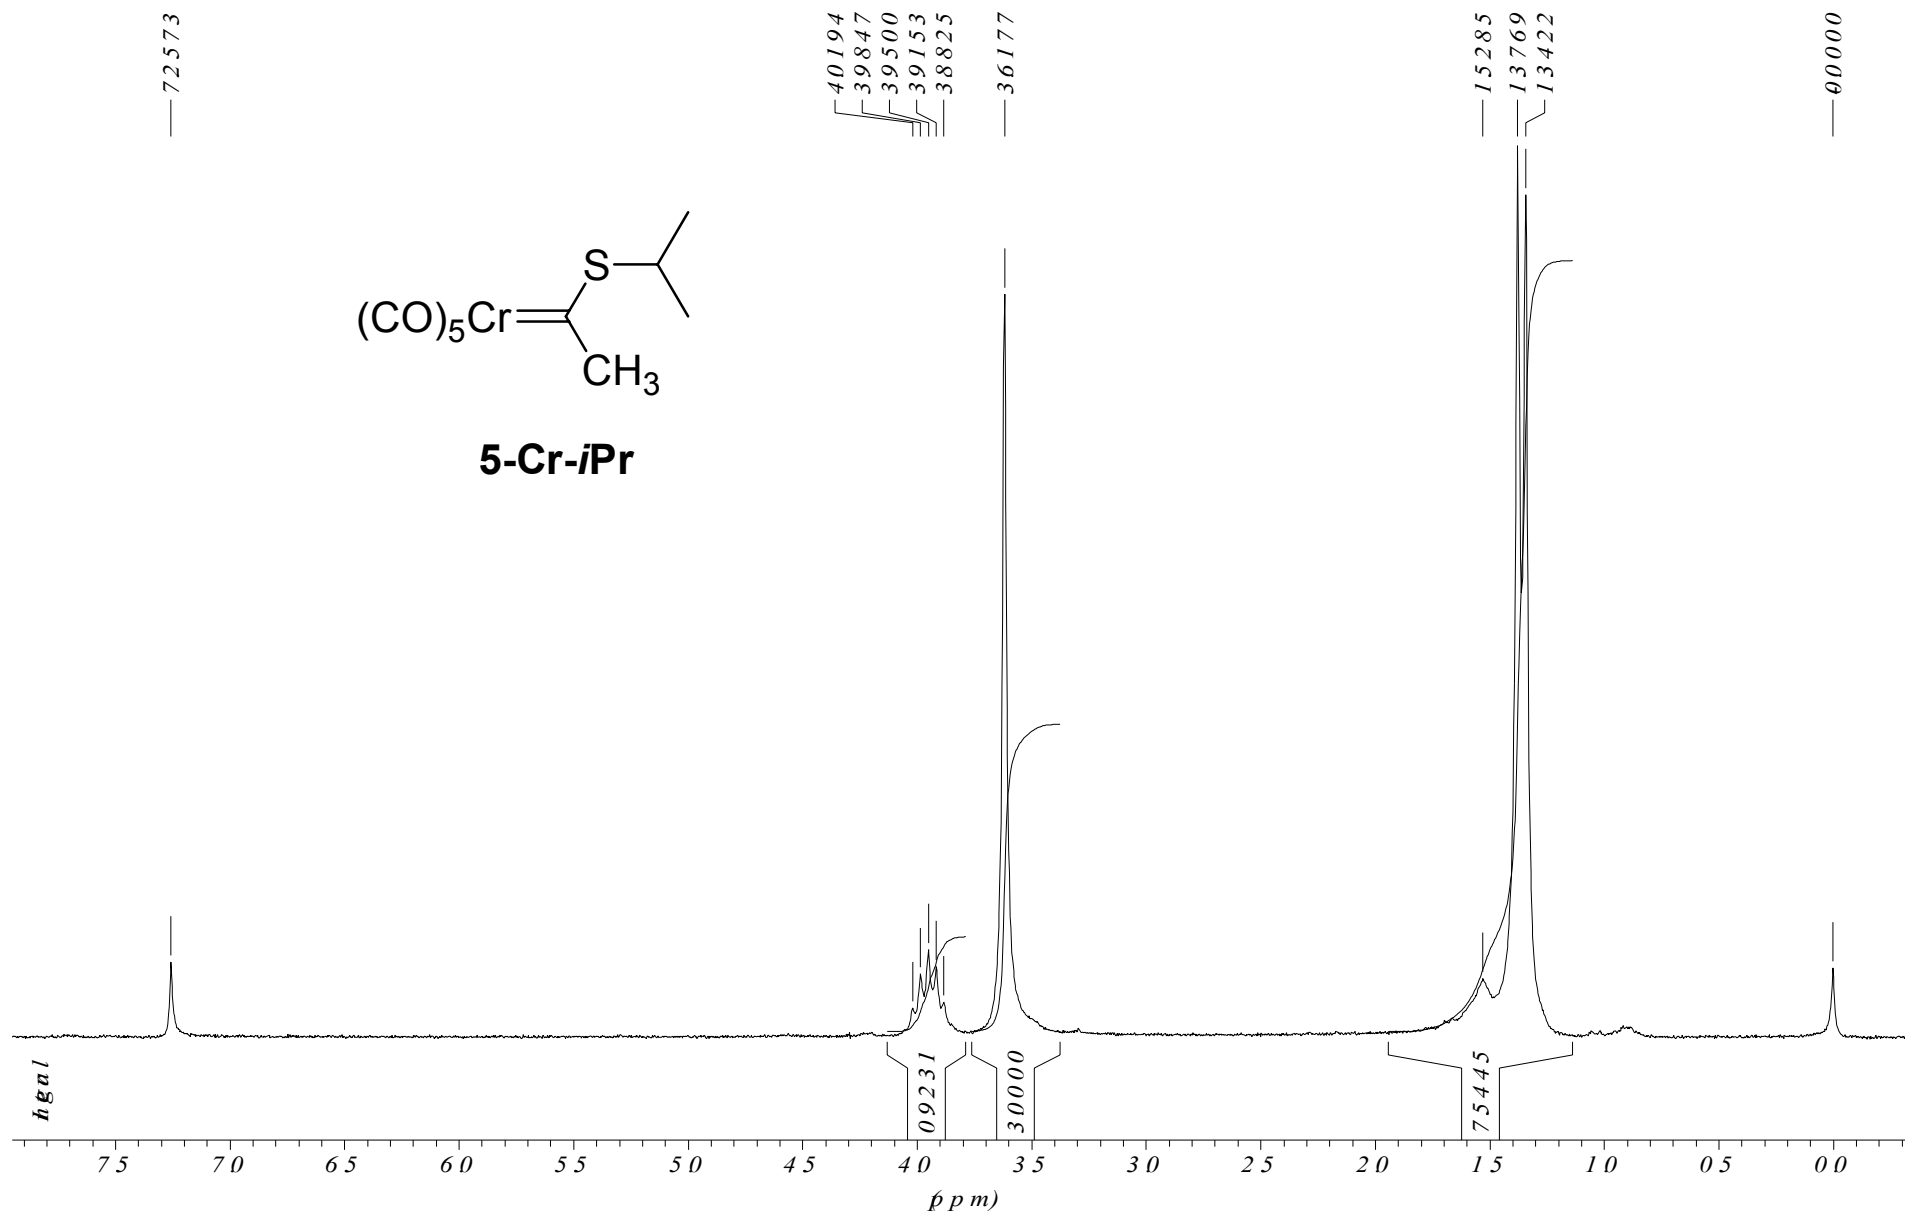

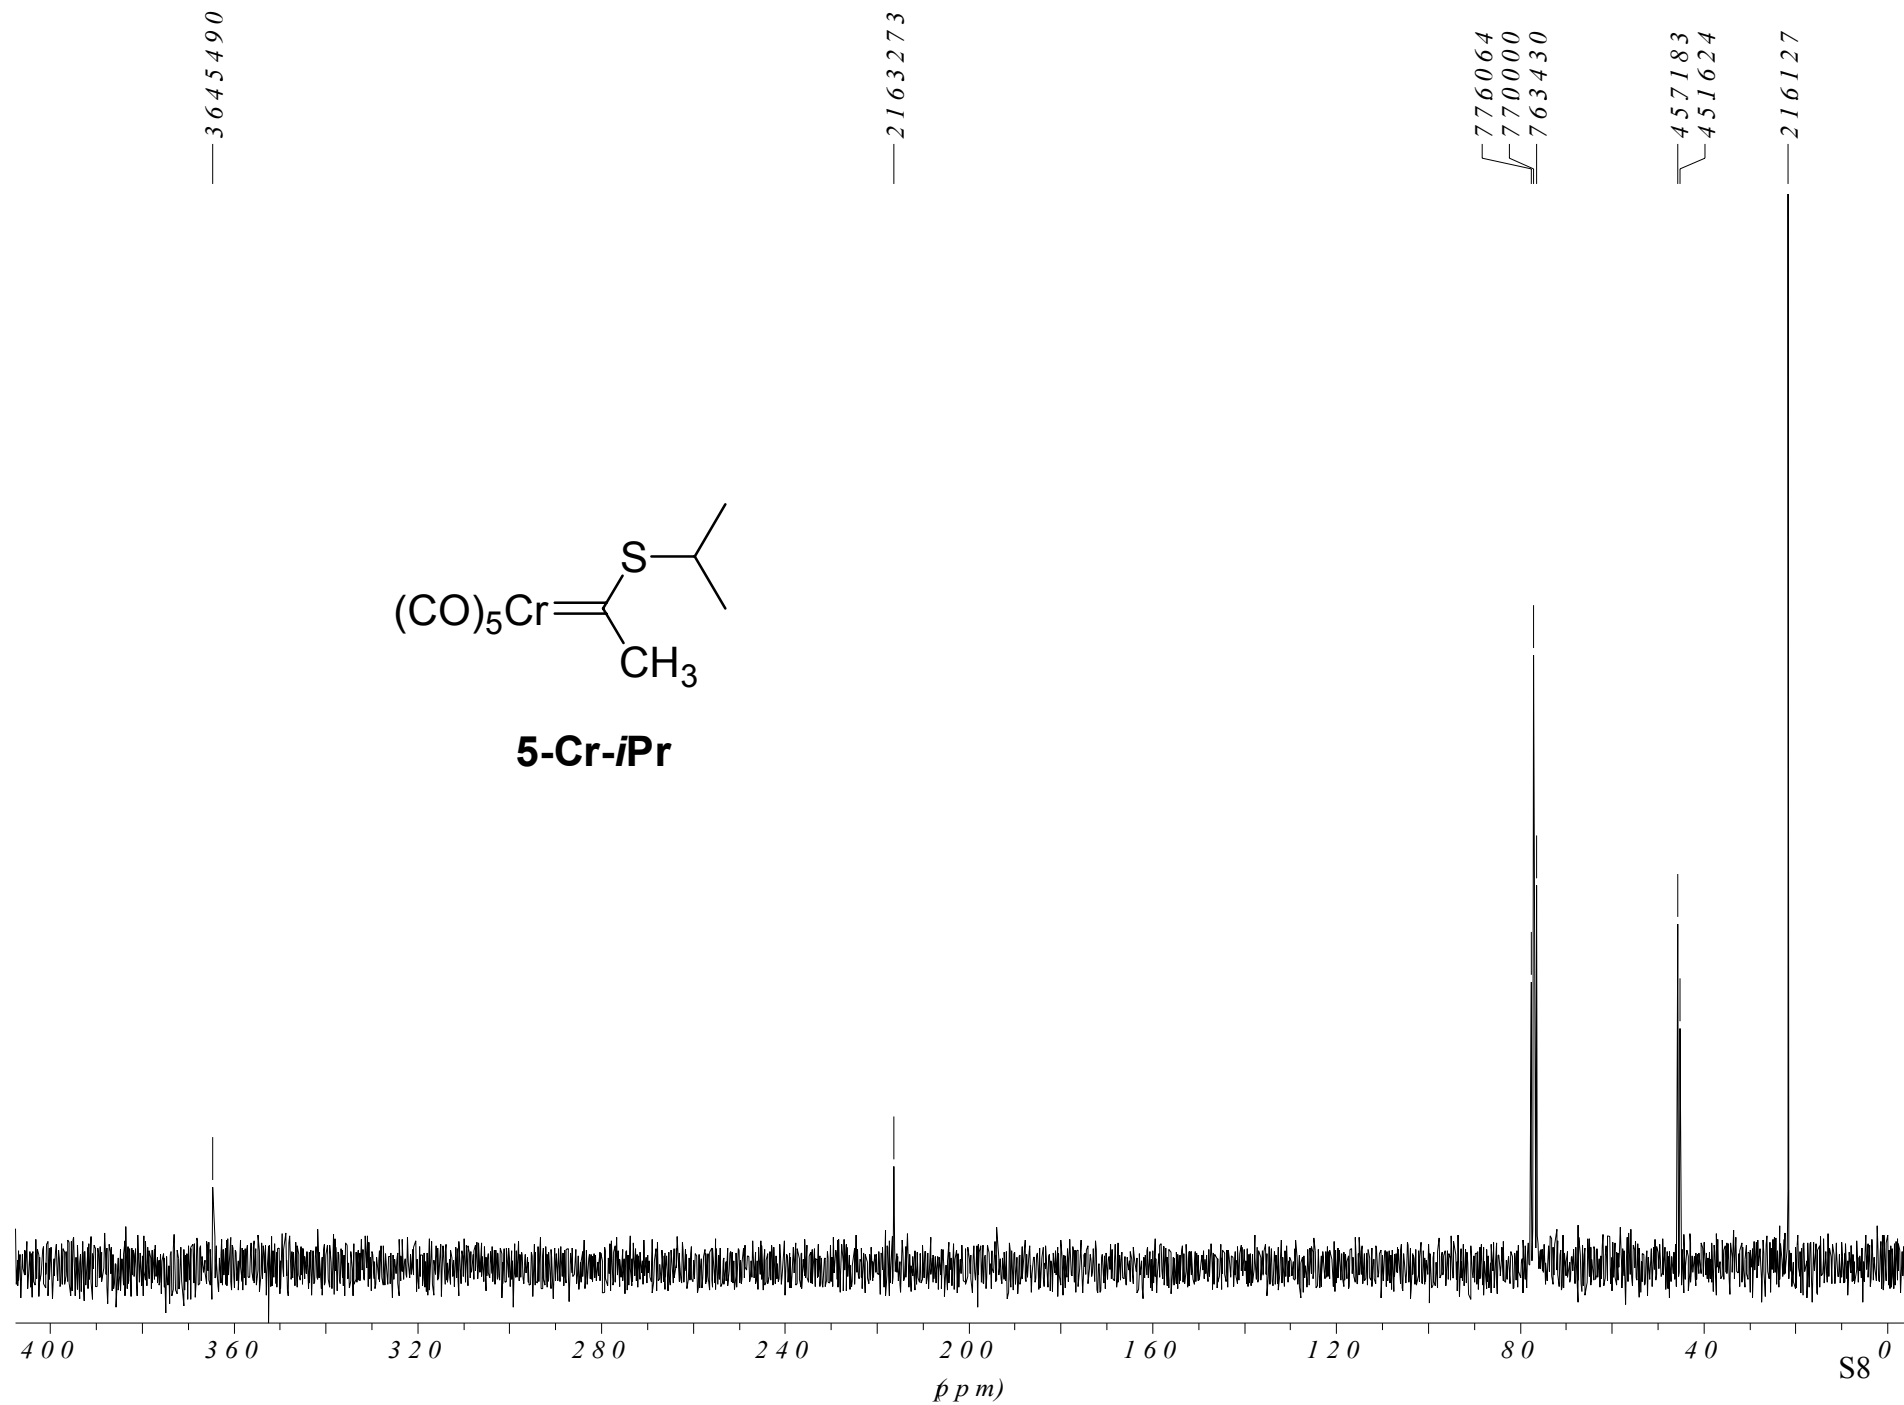



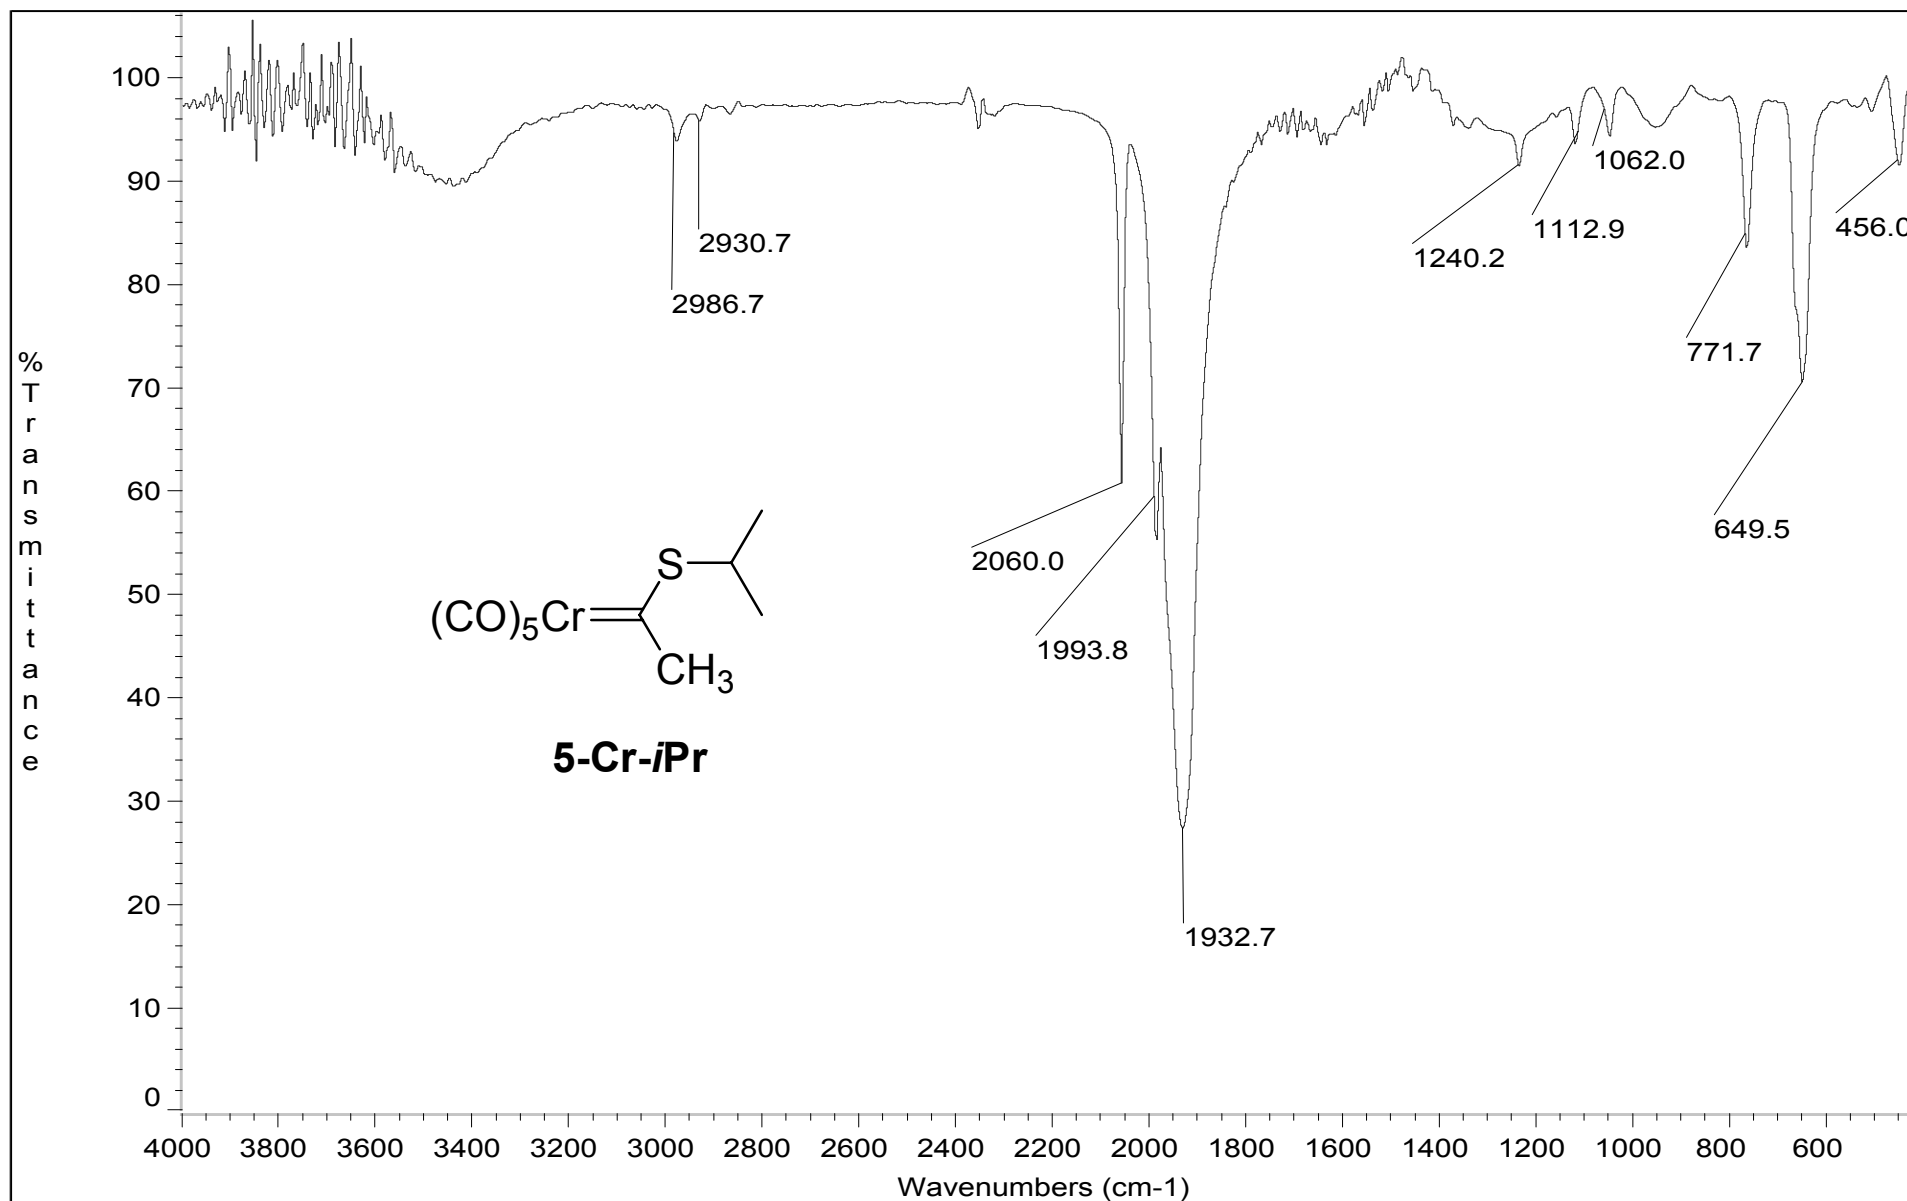

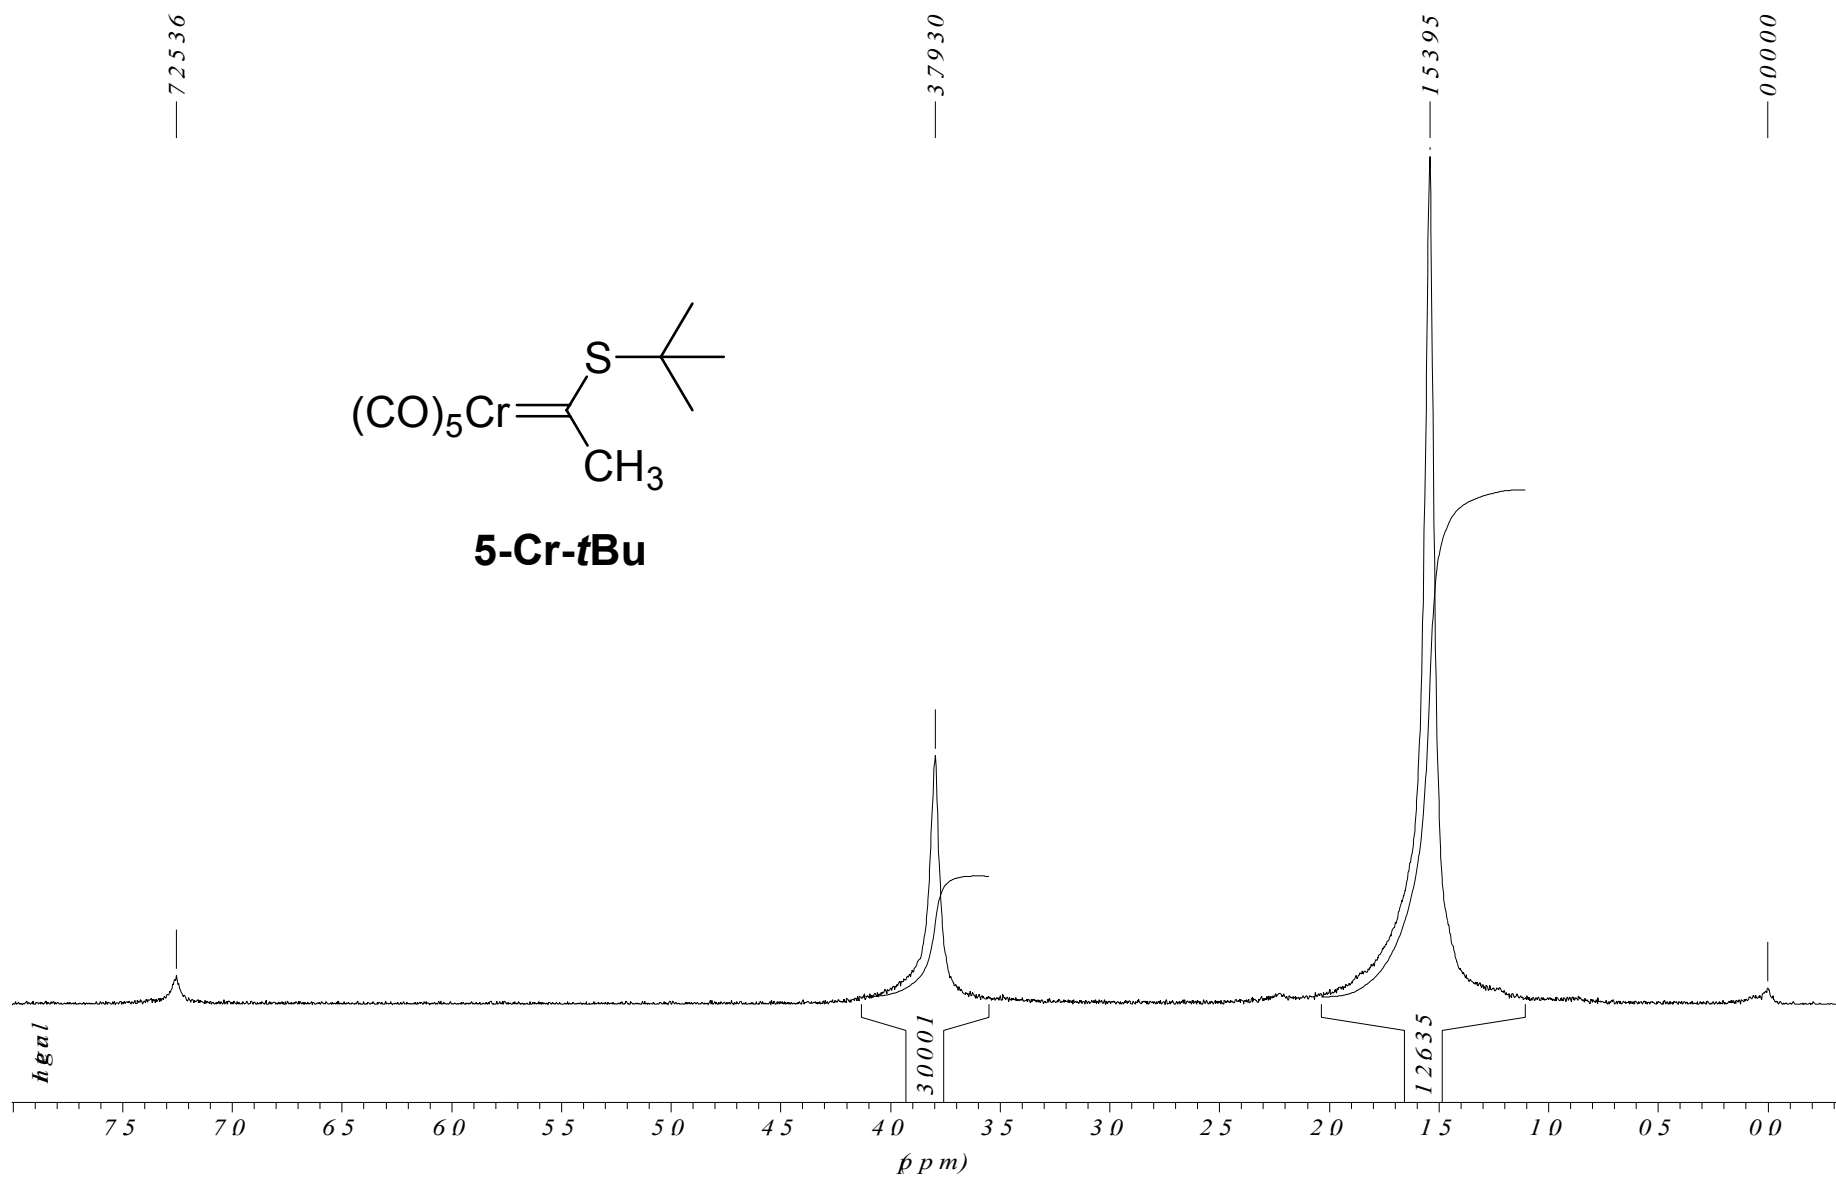

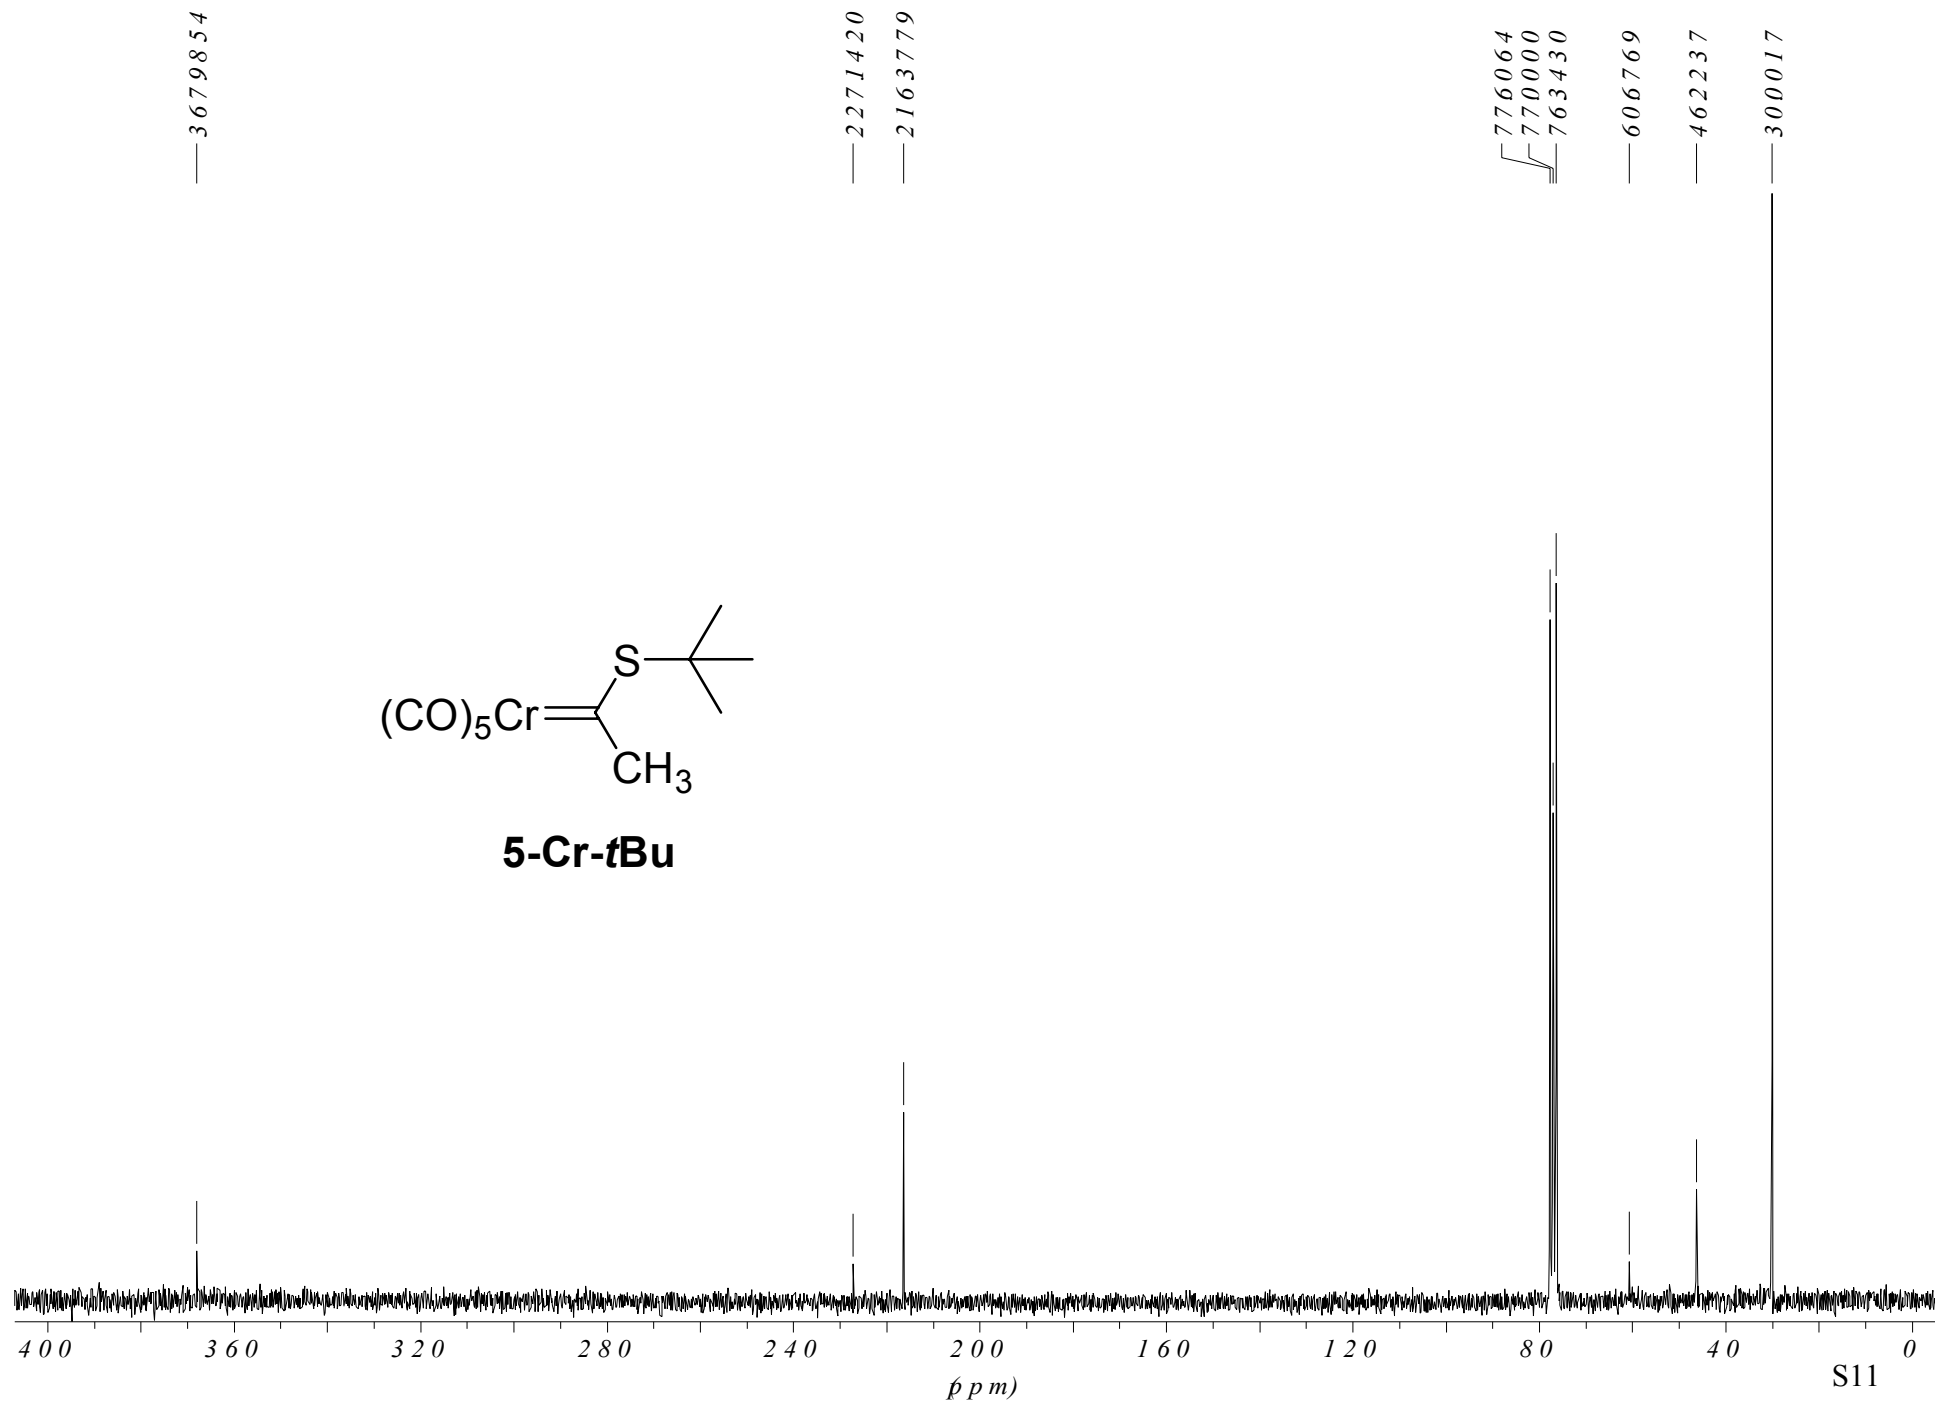

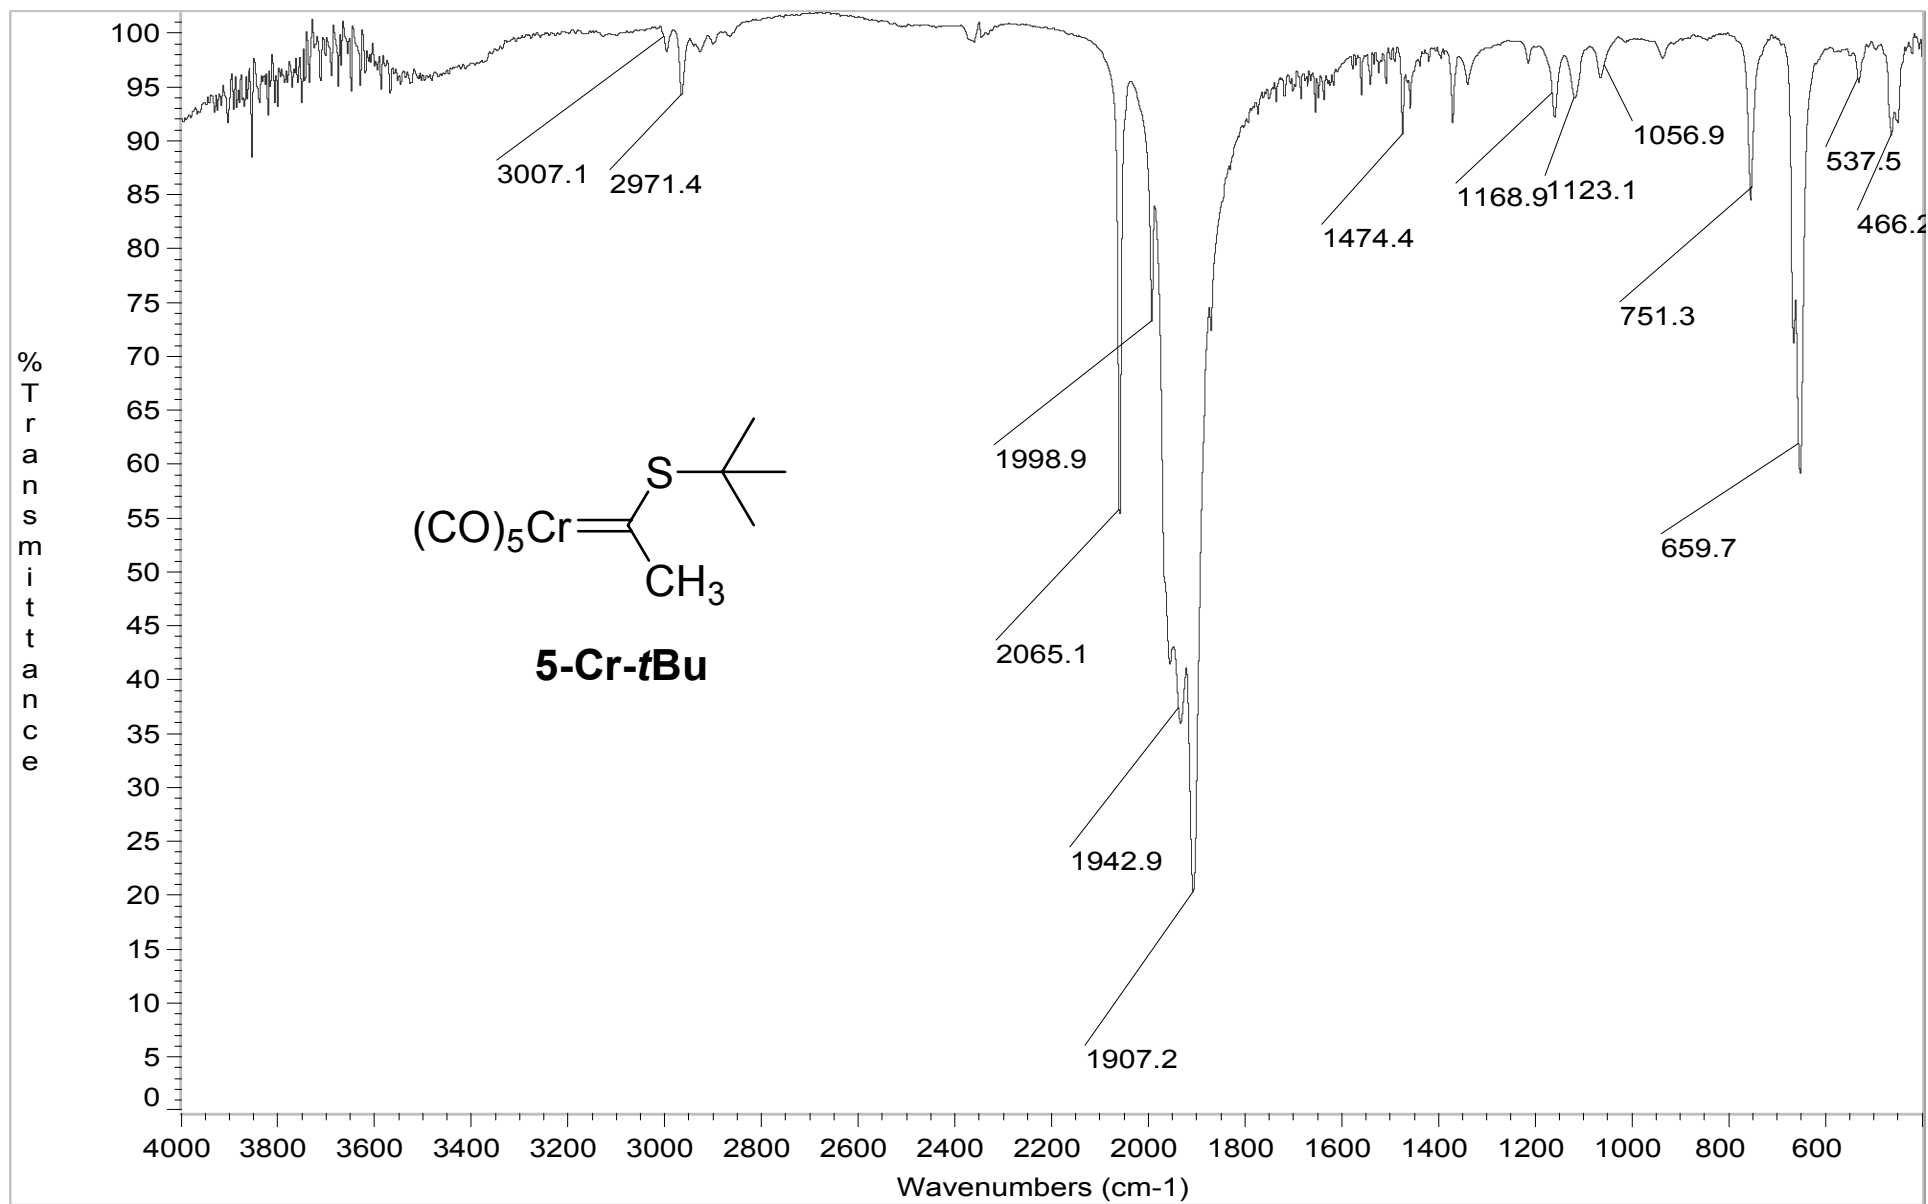

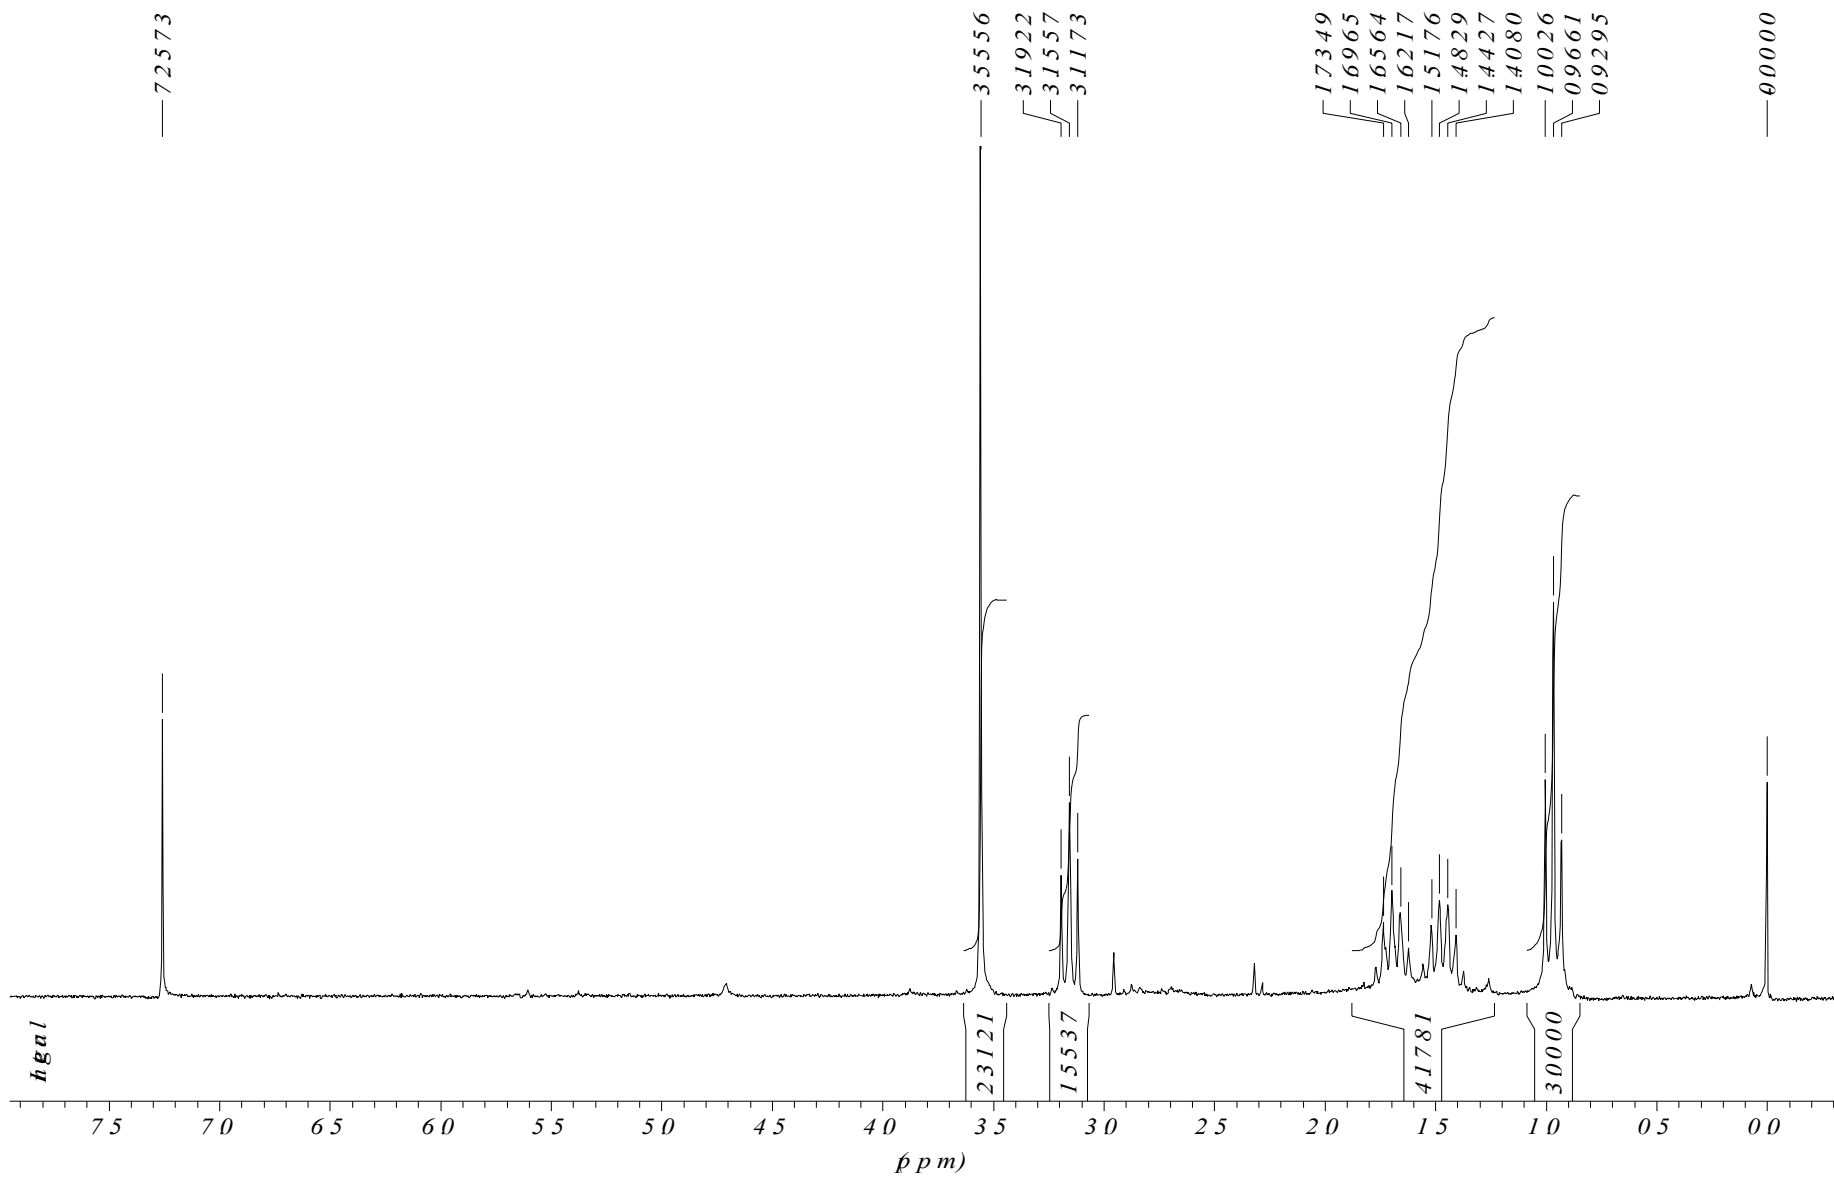

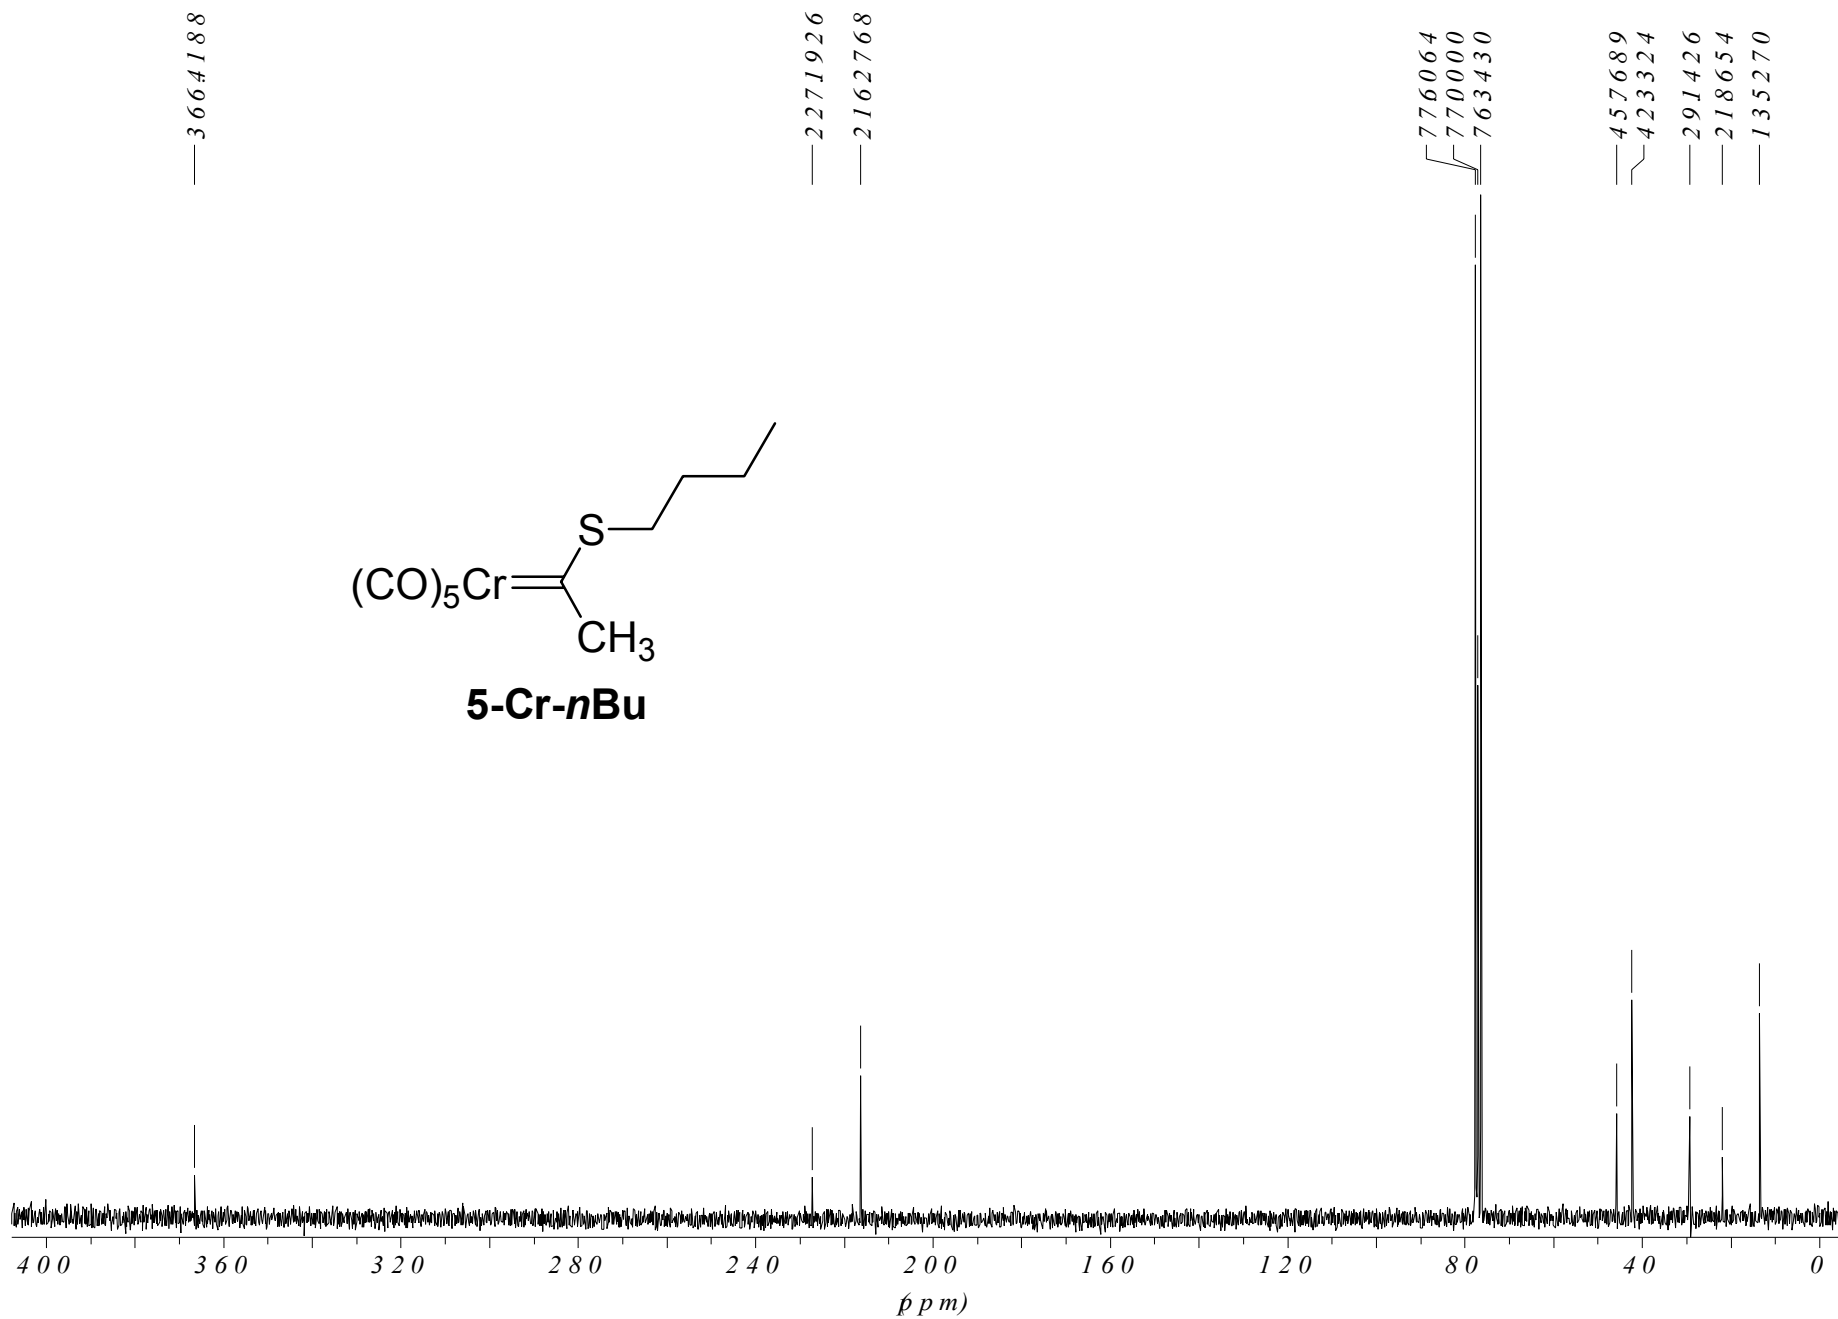

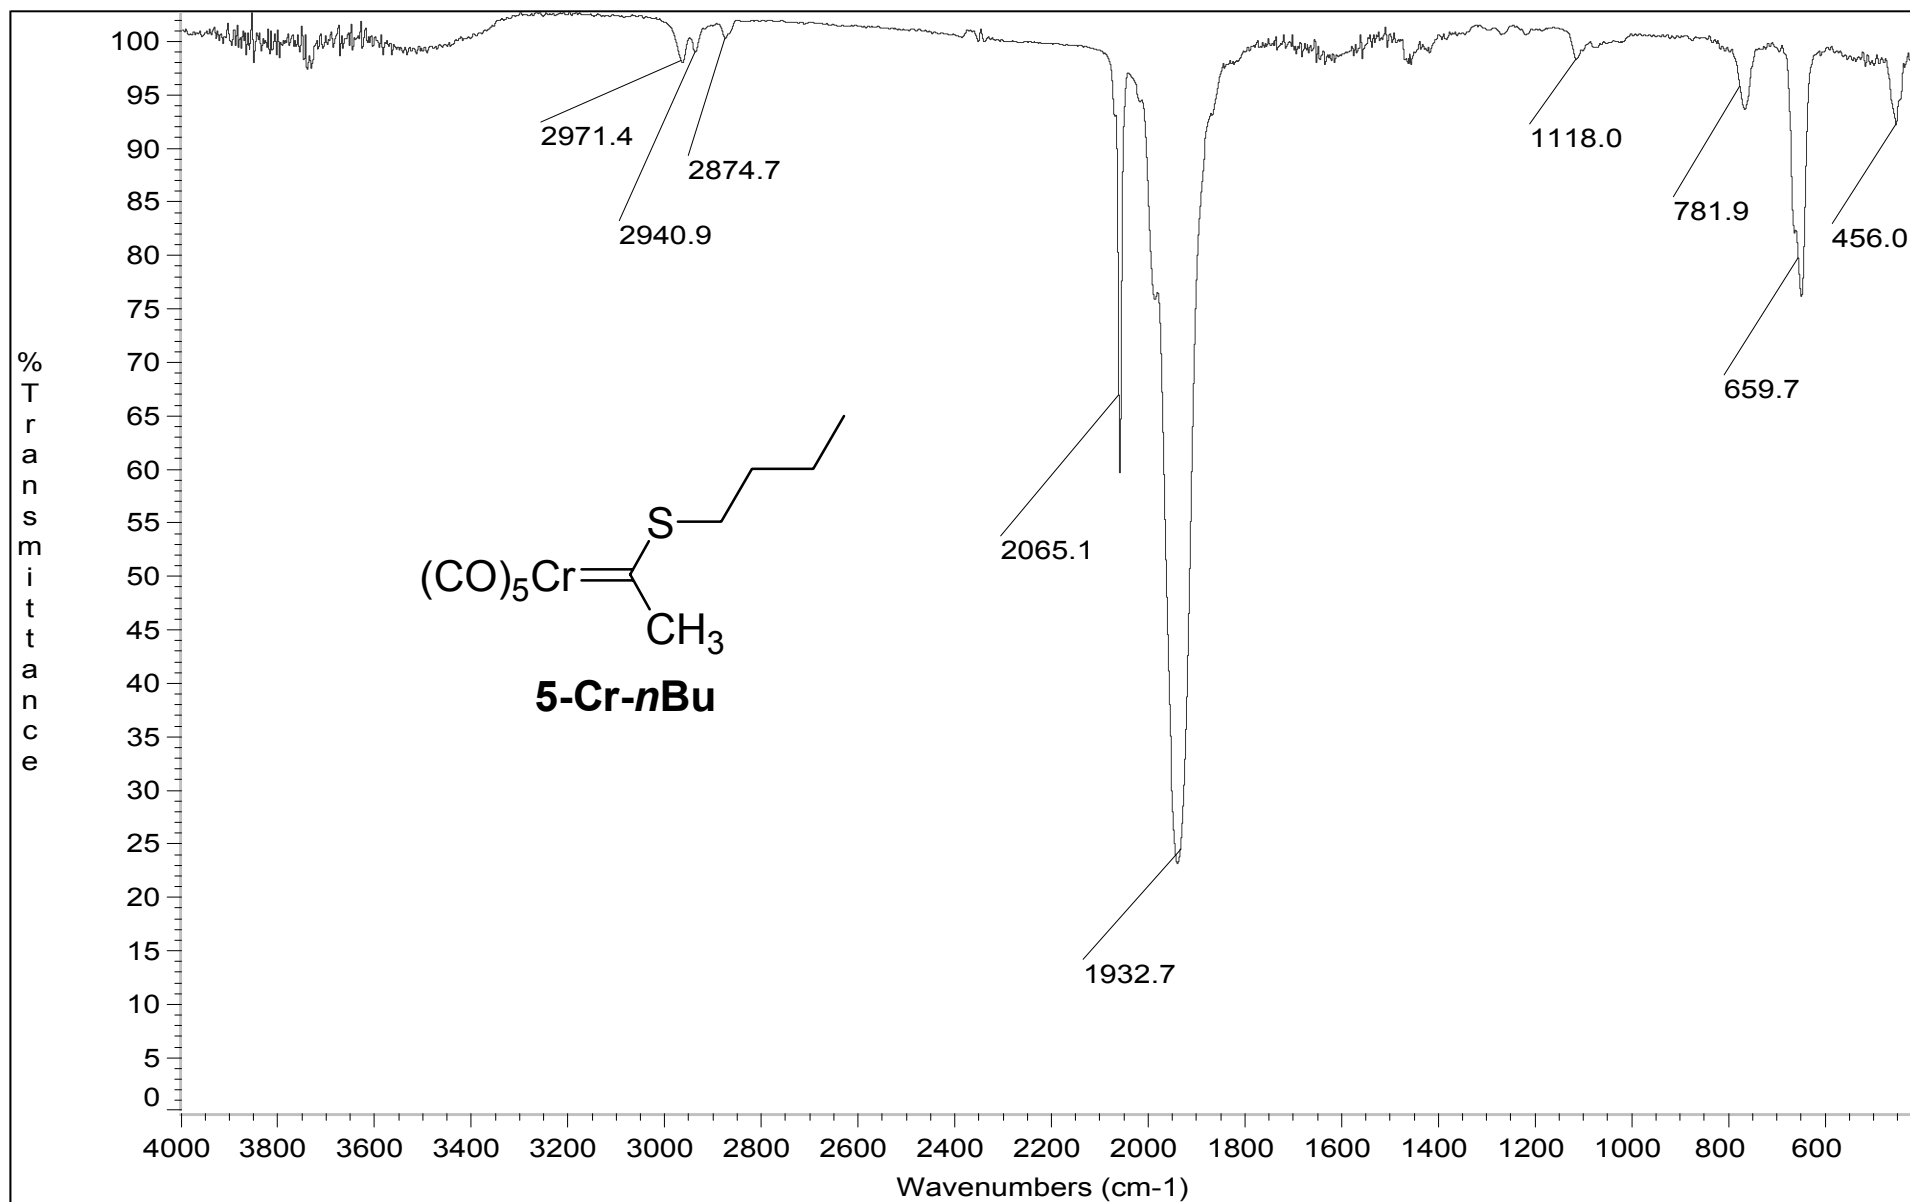

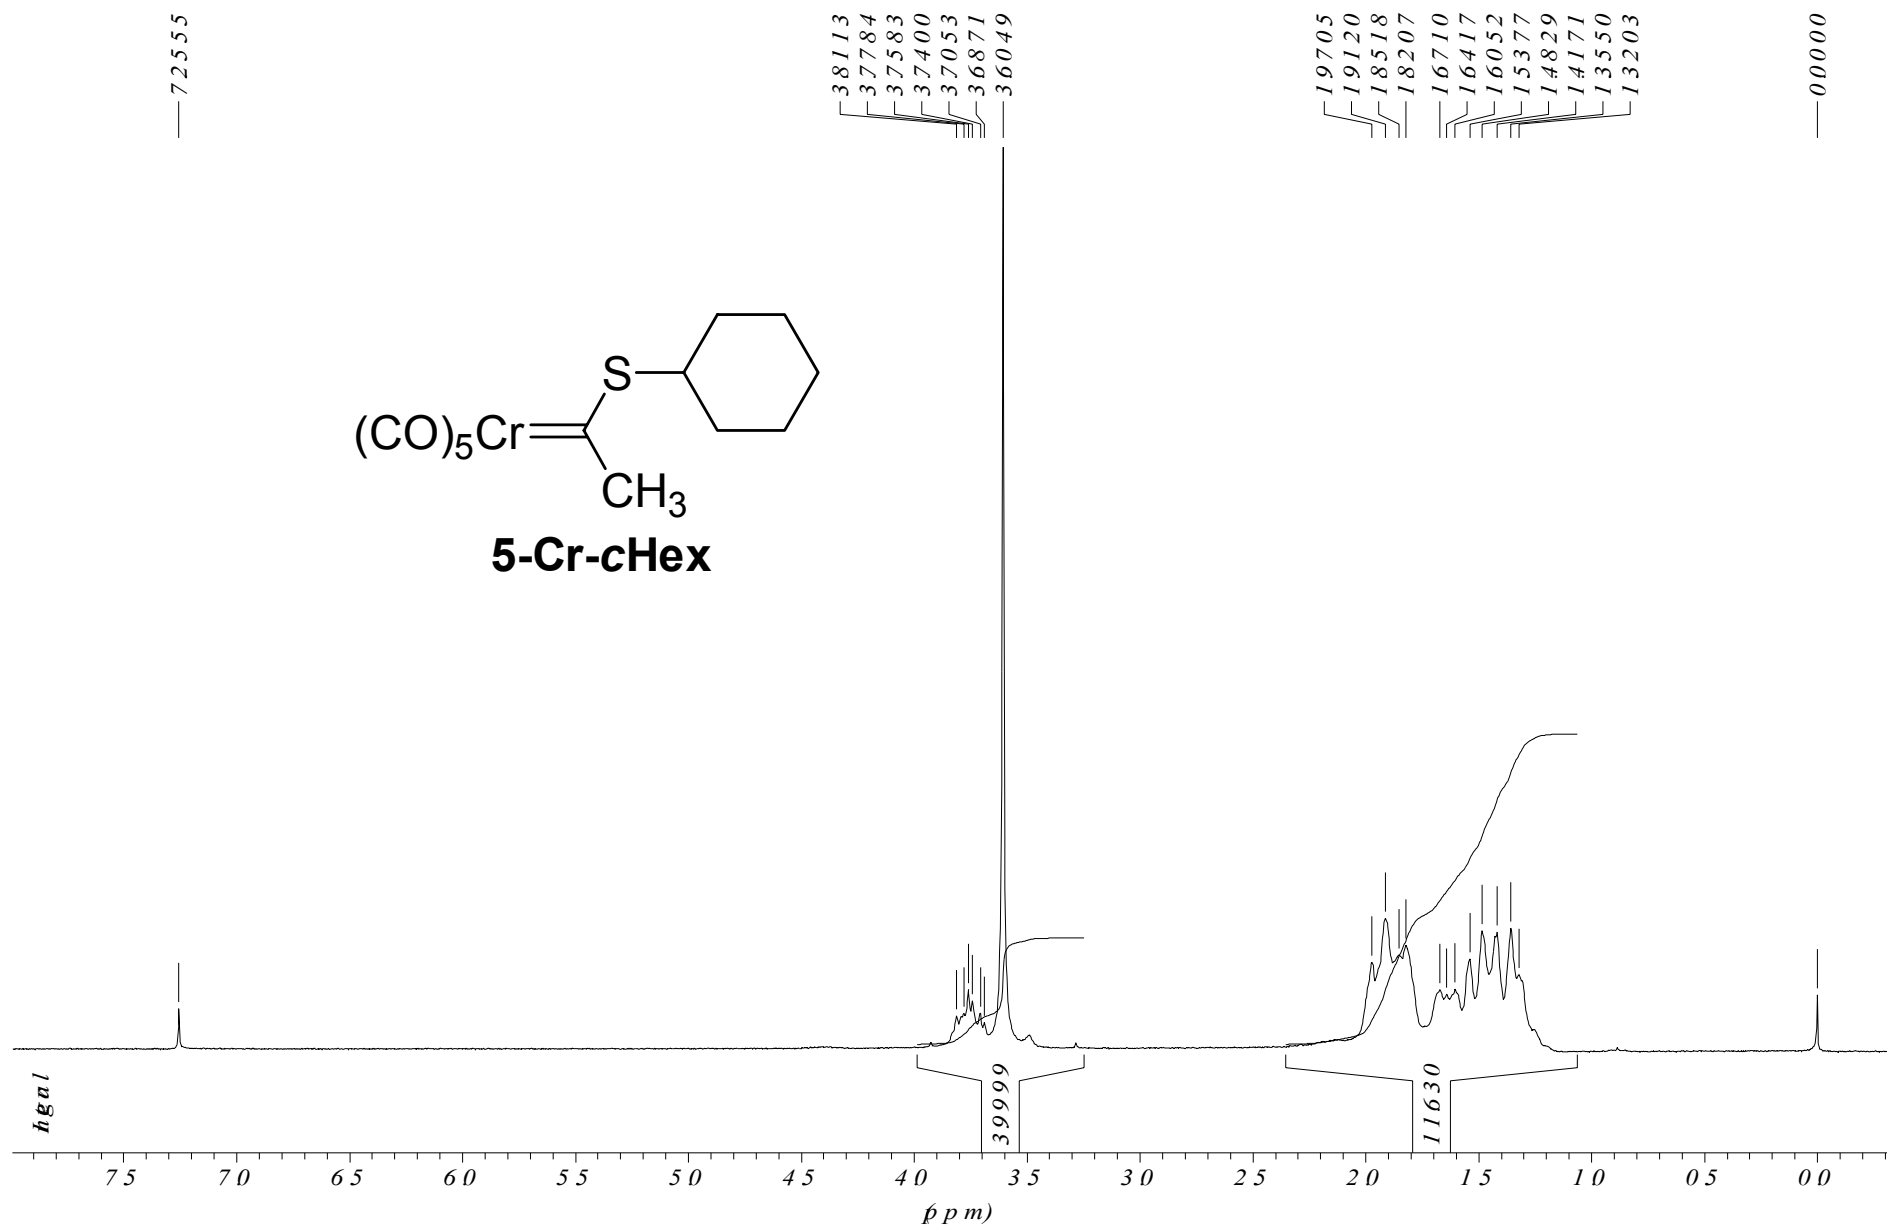



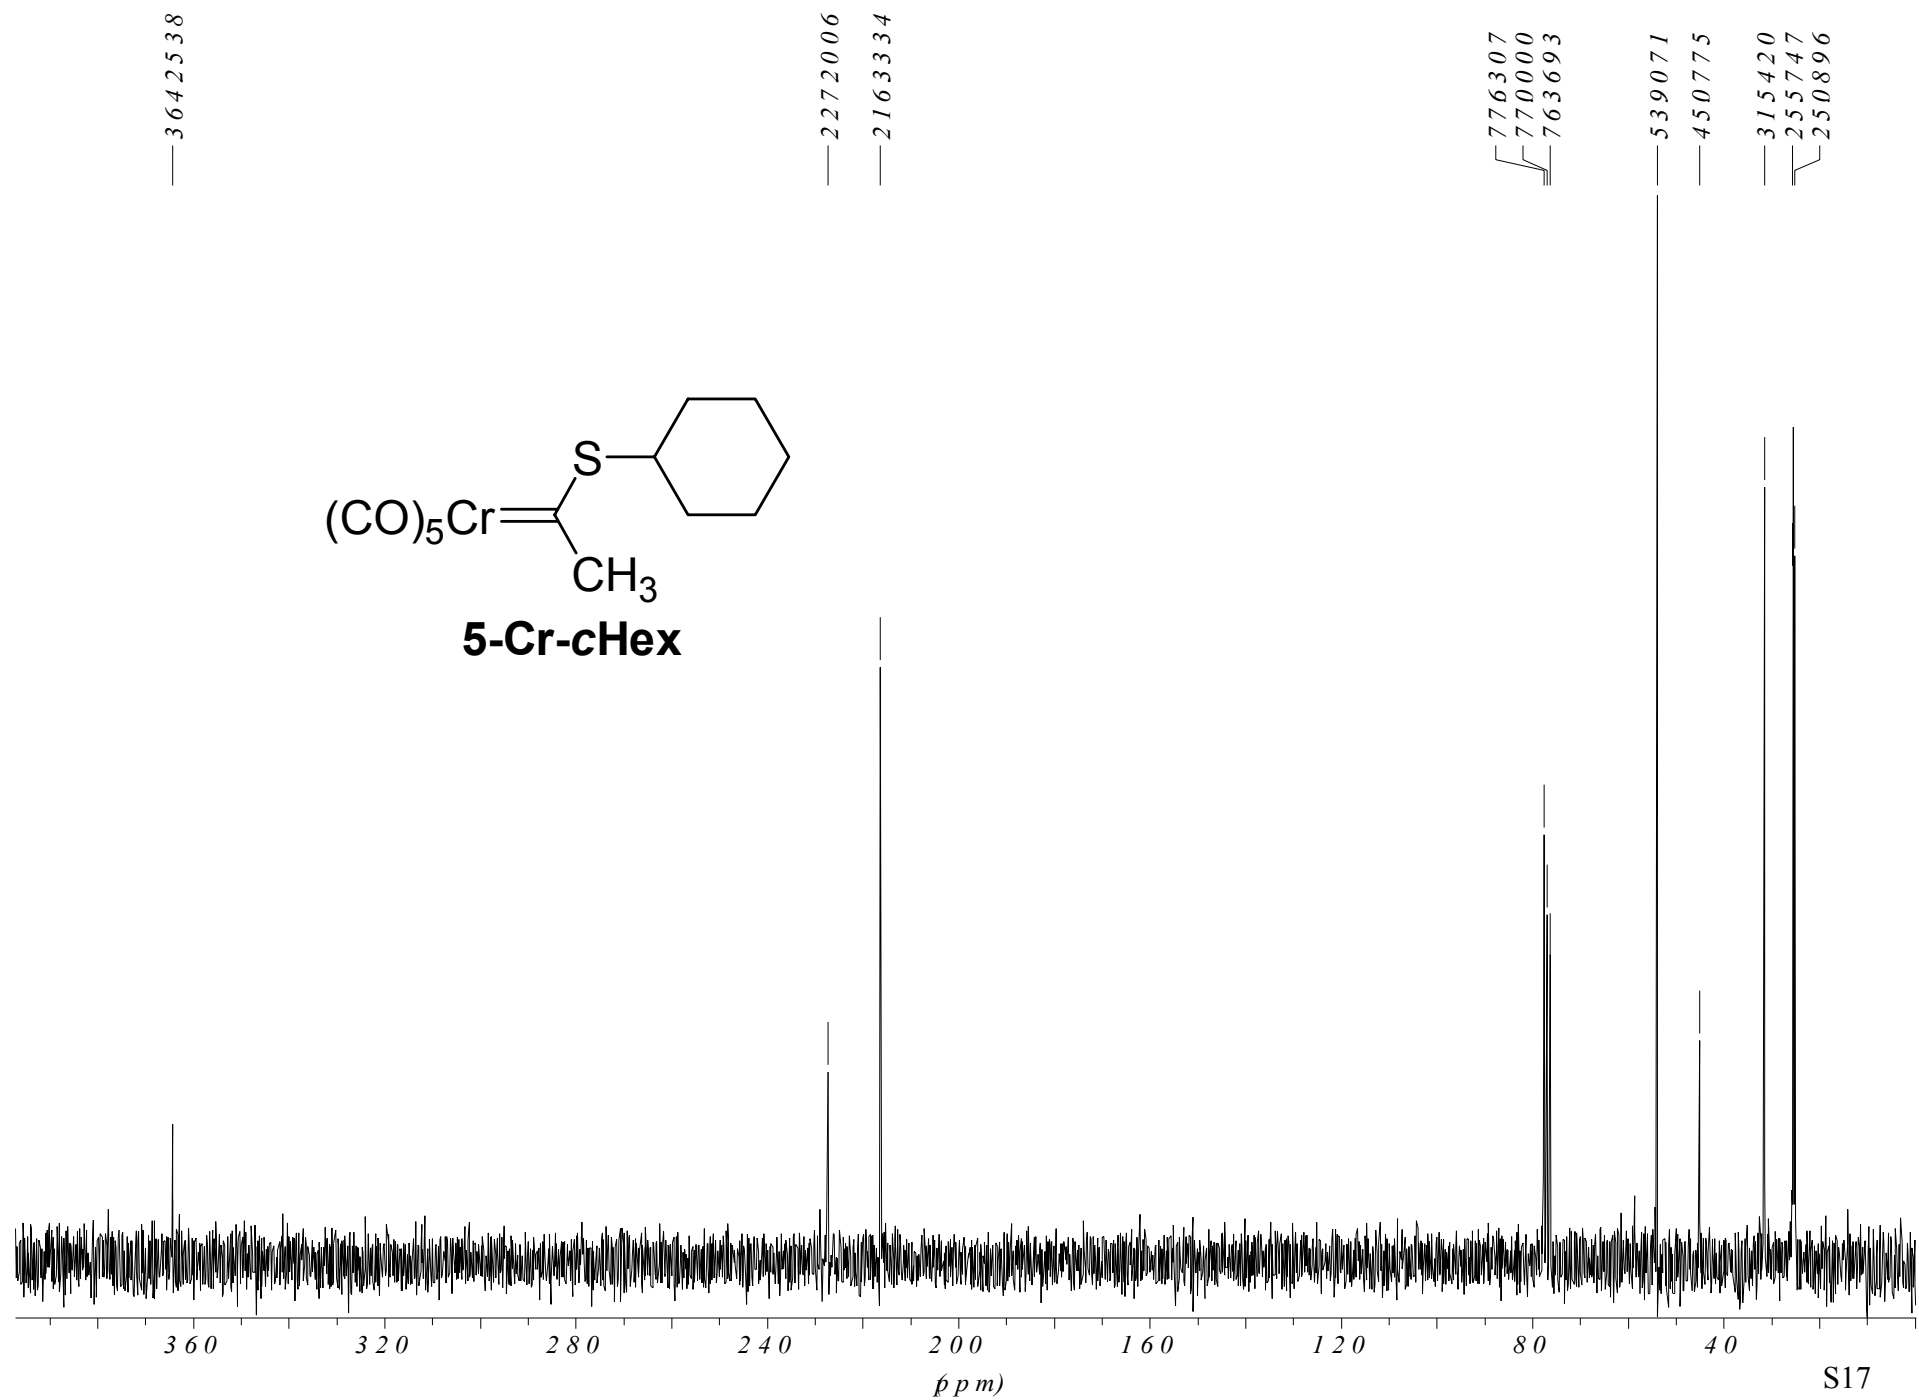

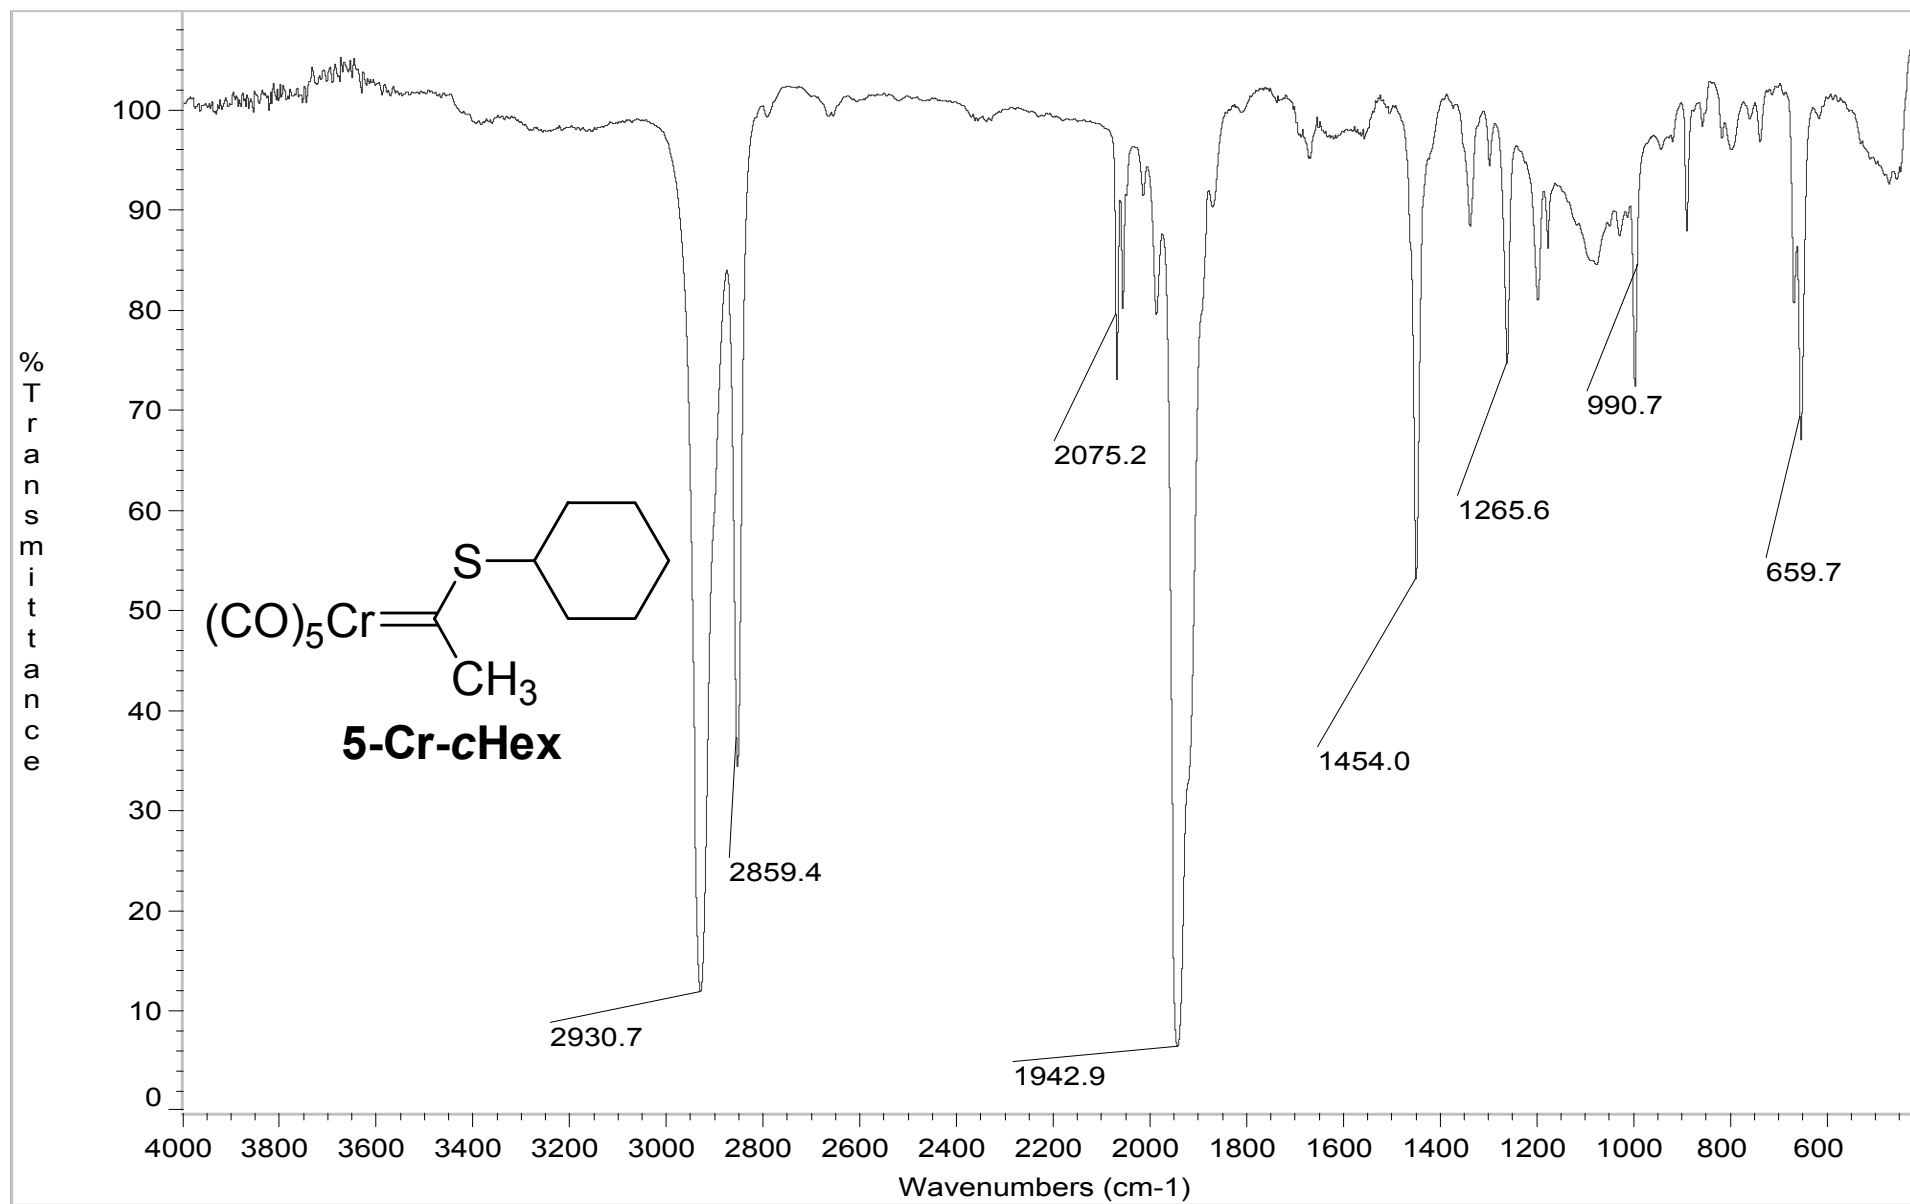

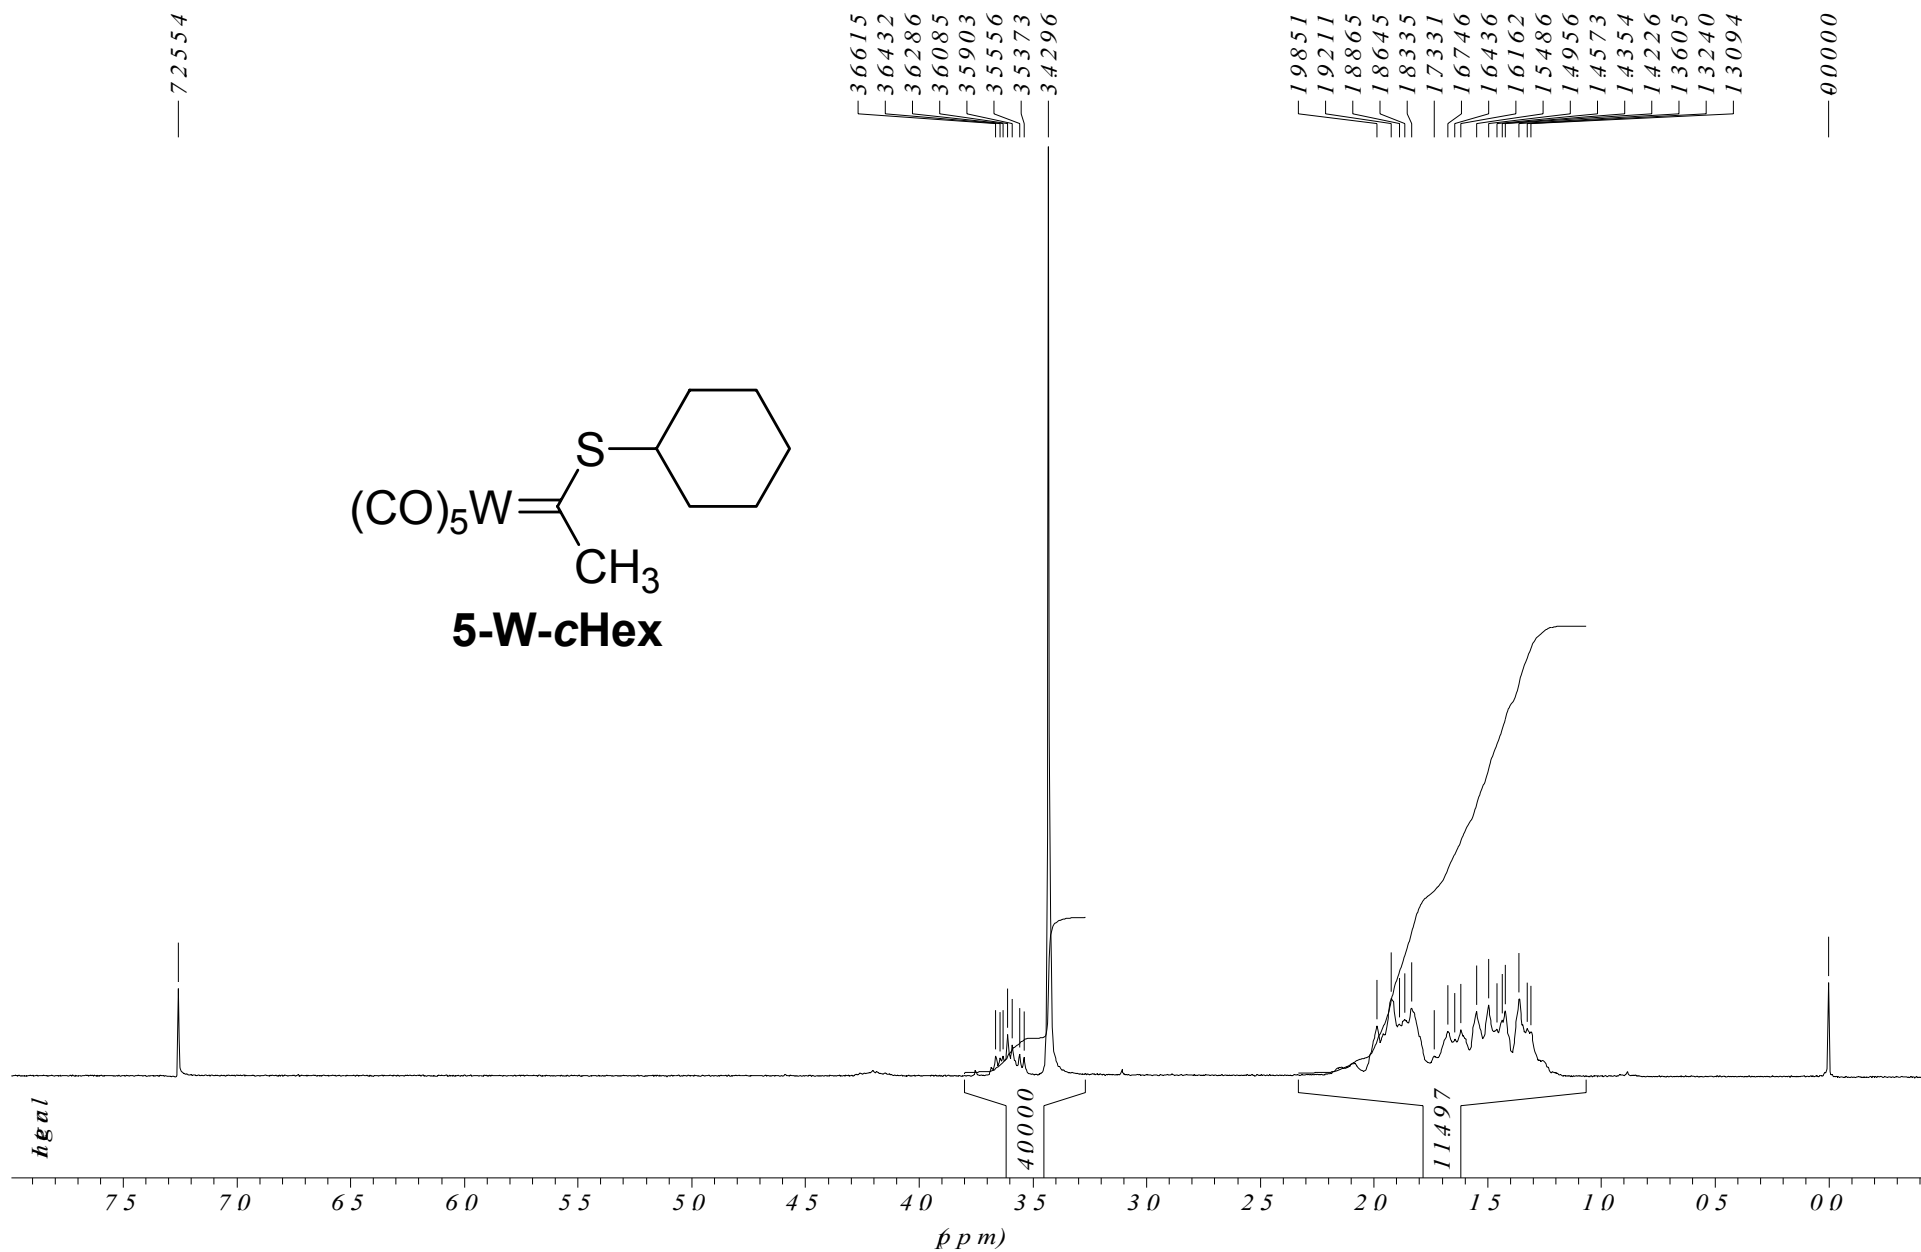

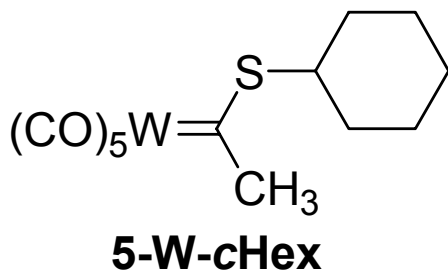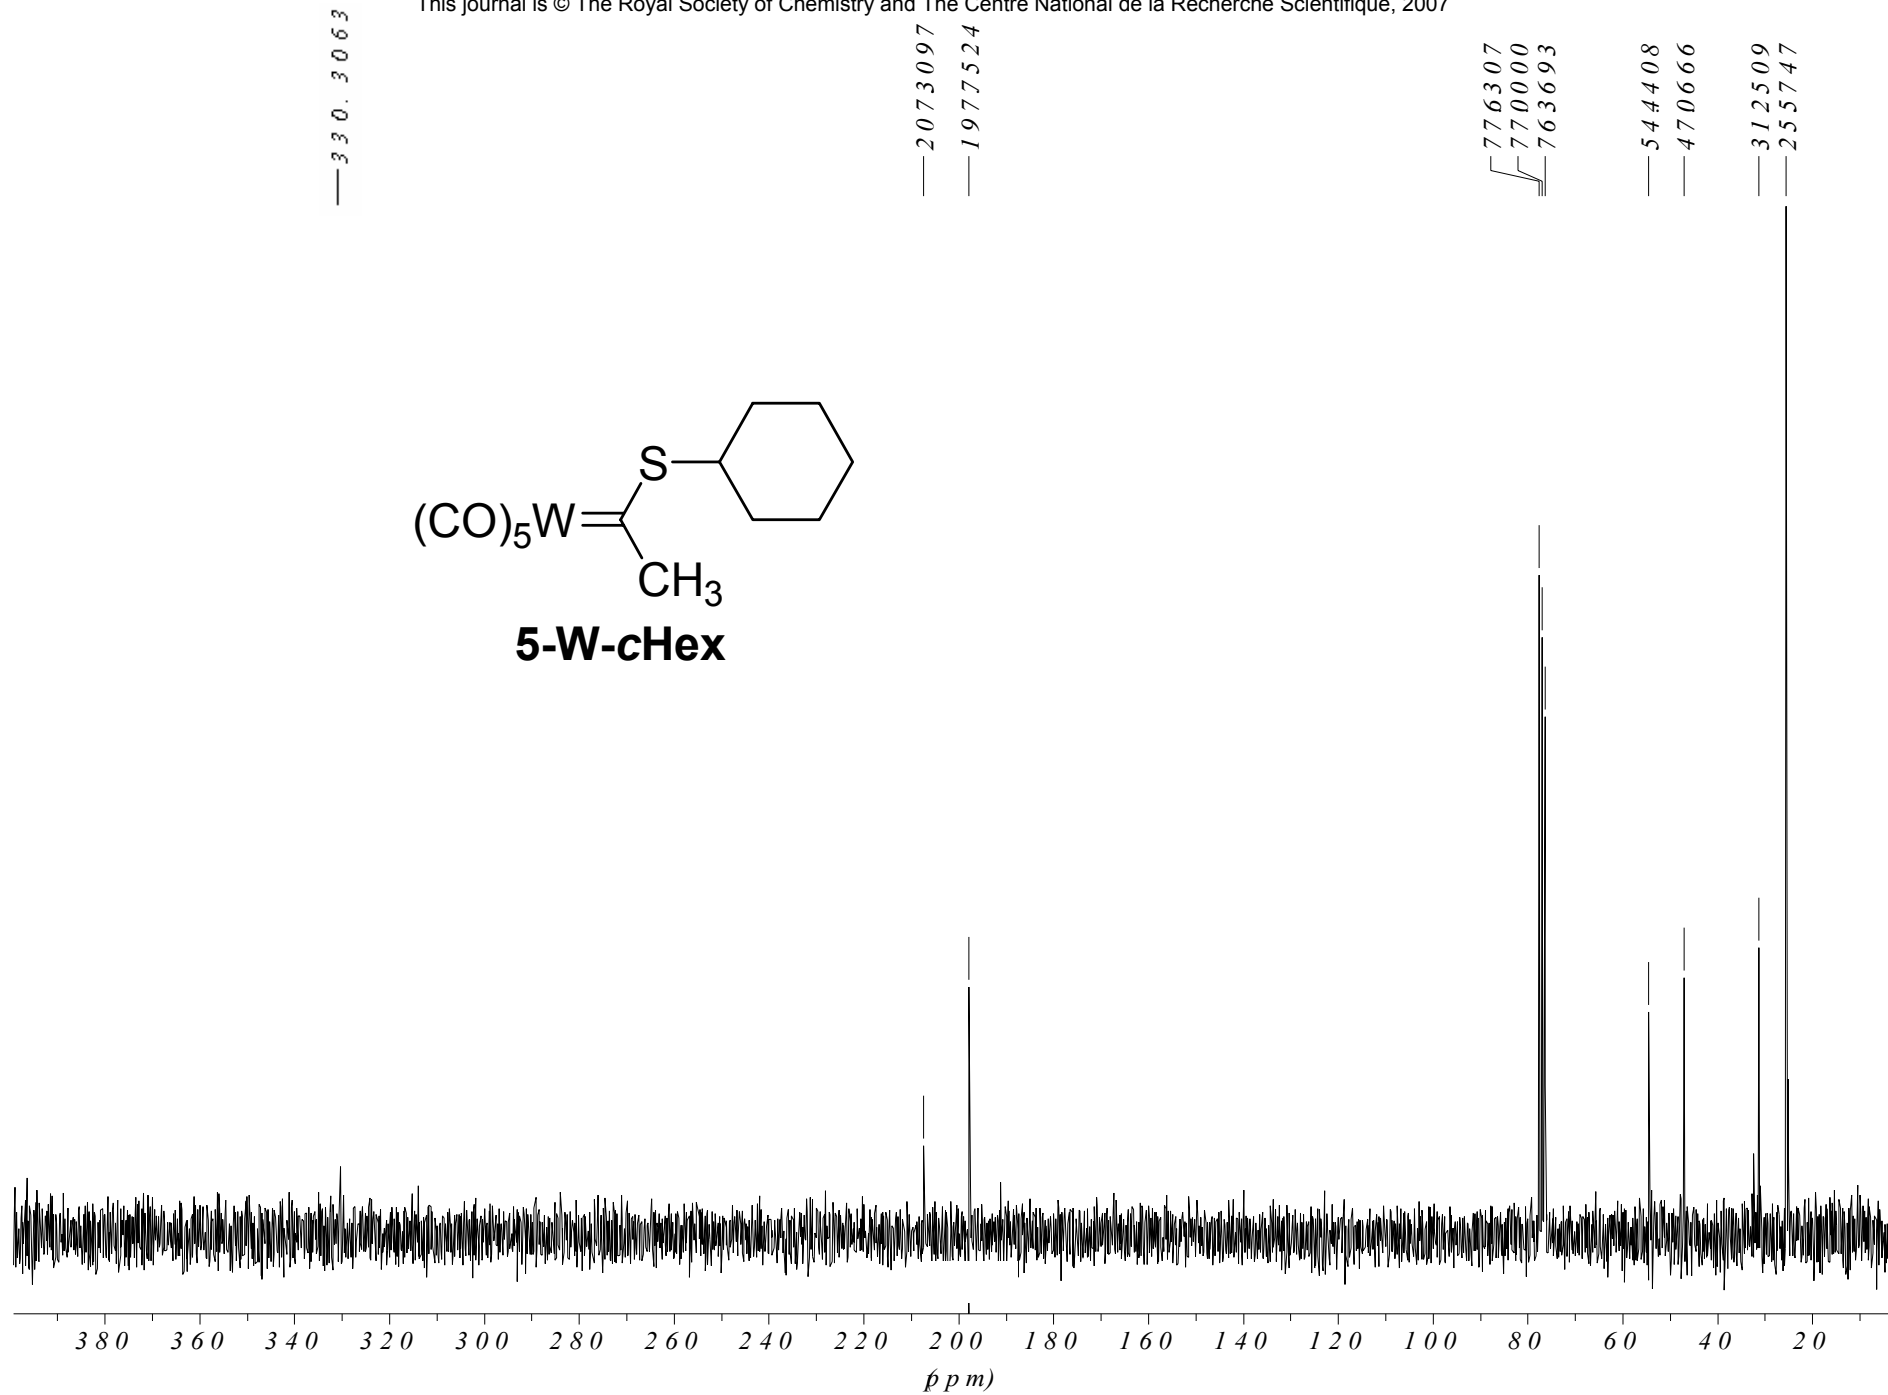

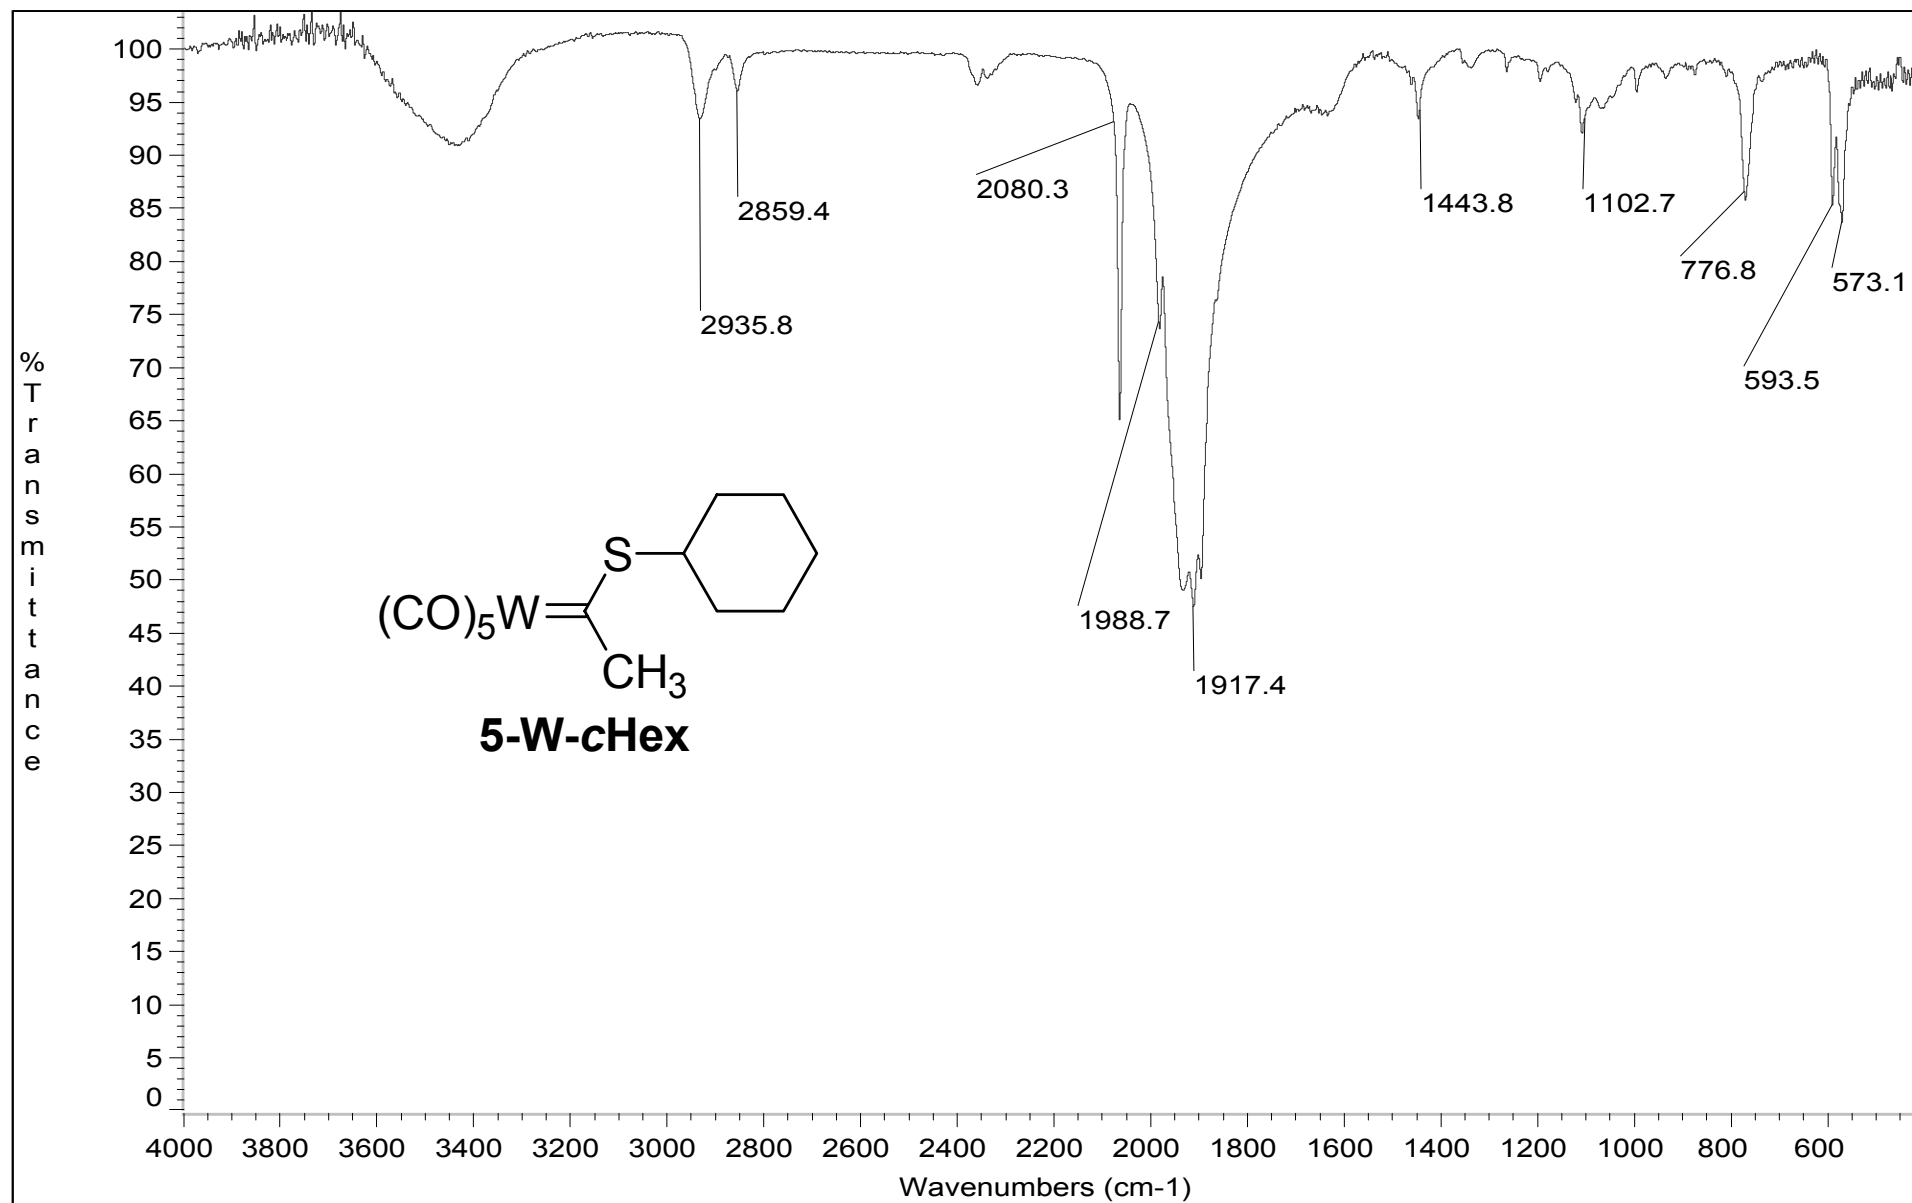

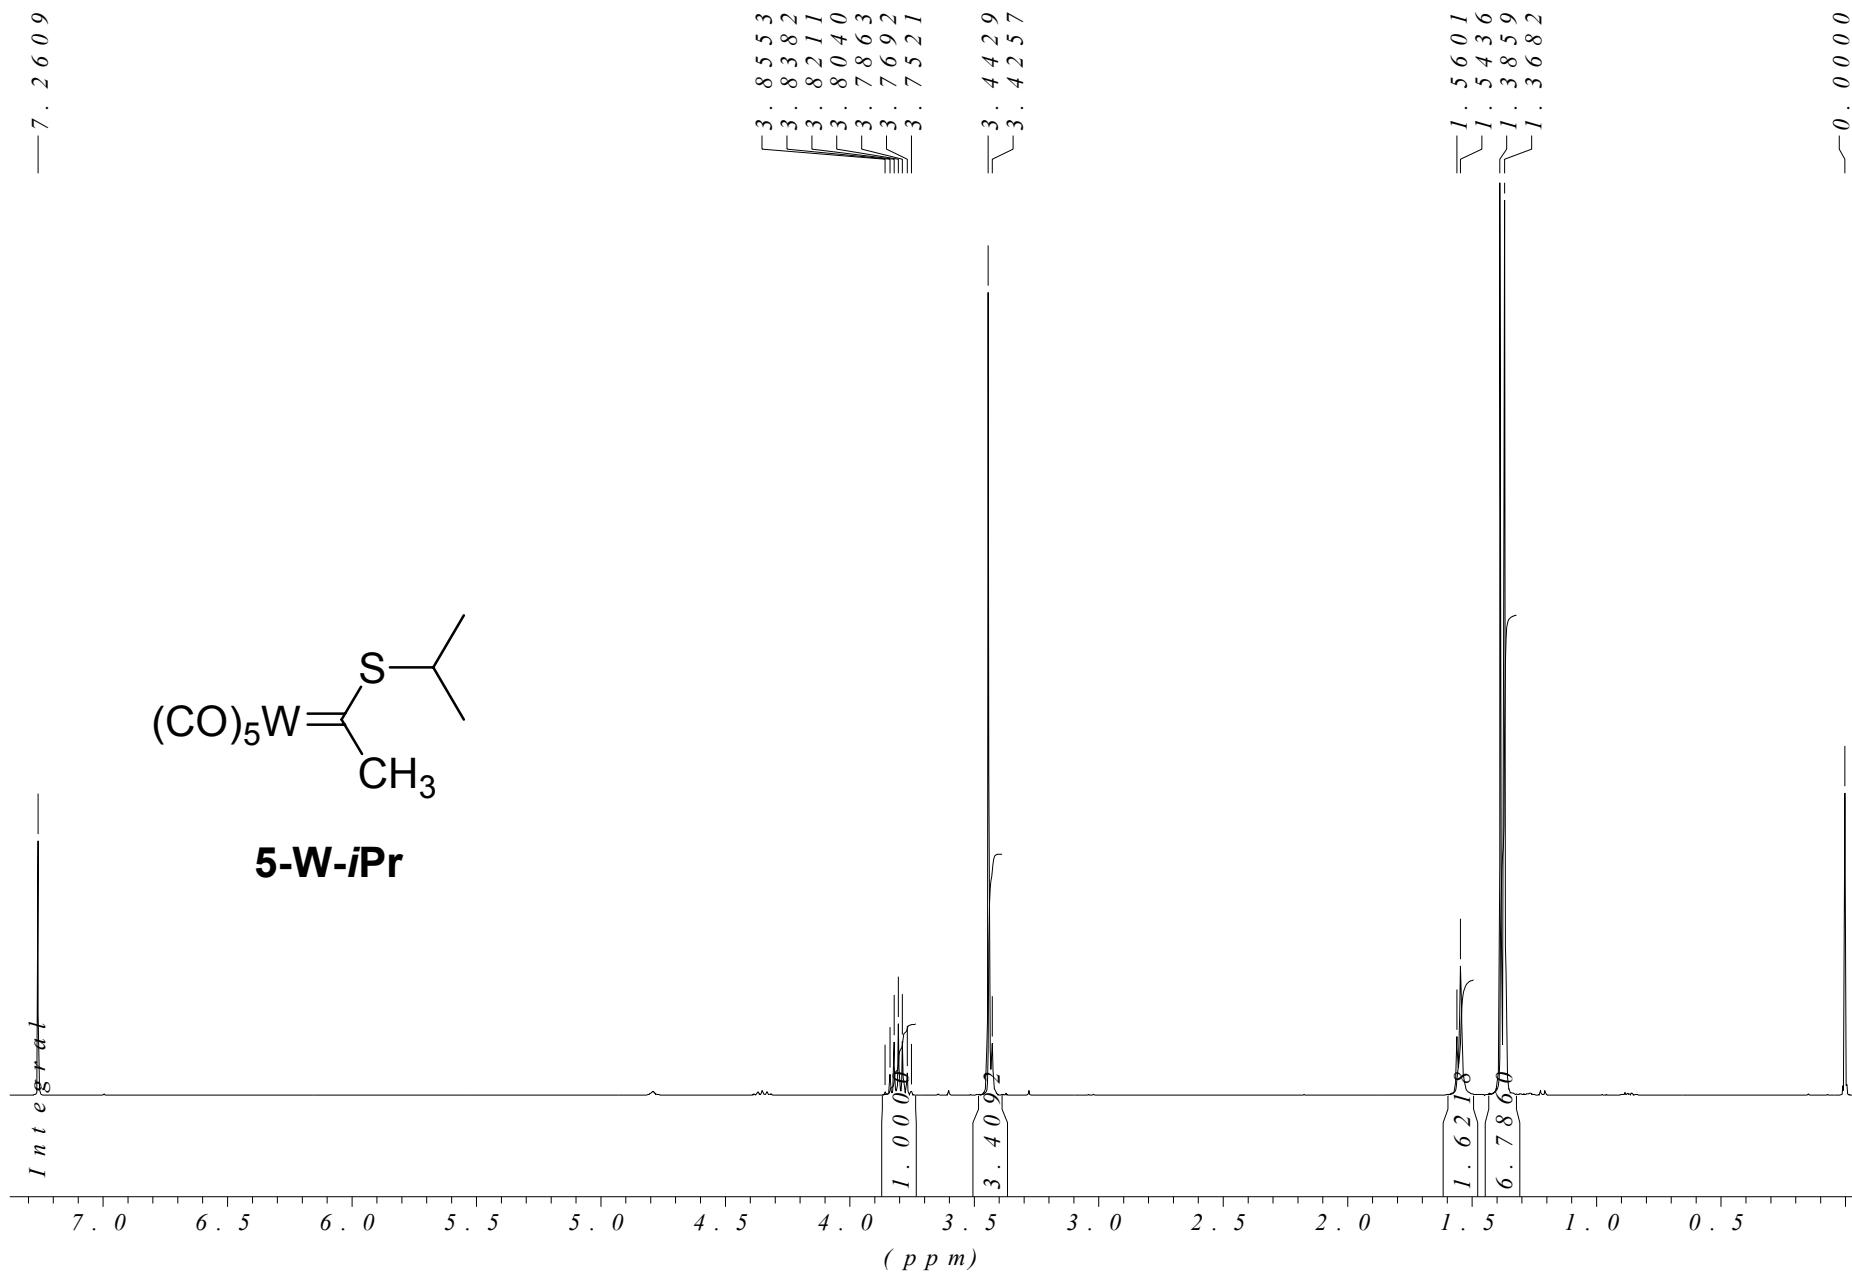

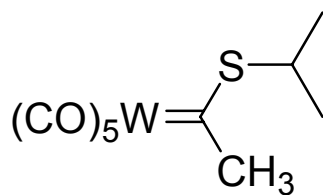

**5-W-*i*Pr**

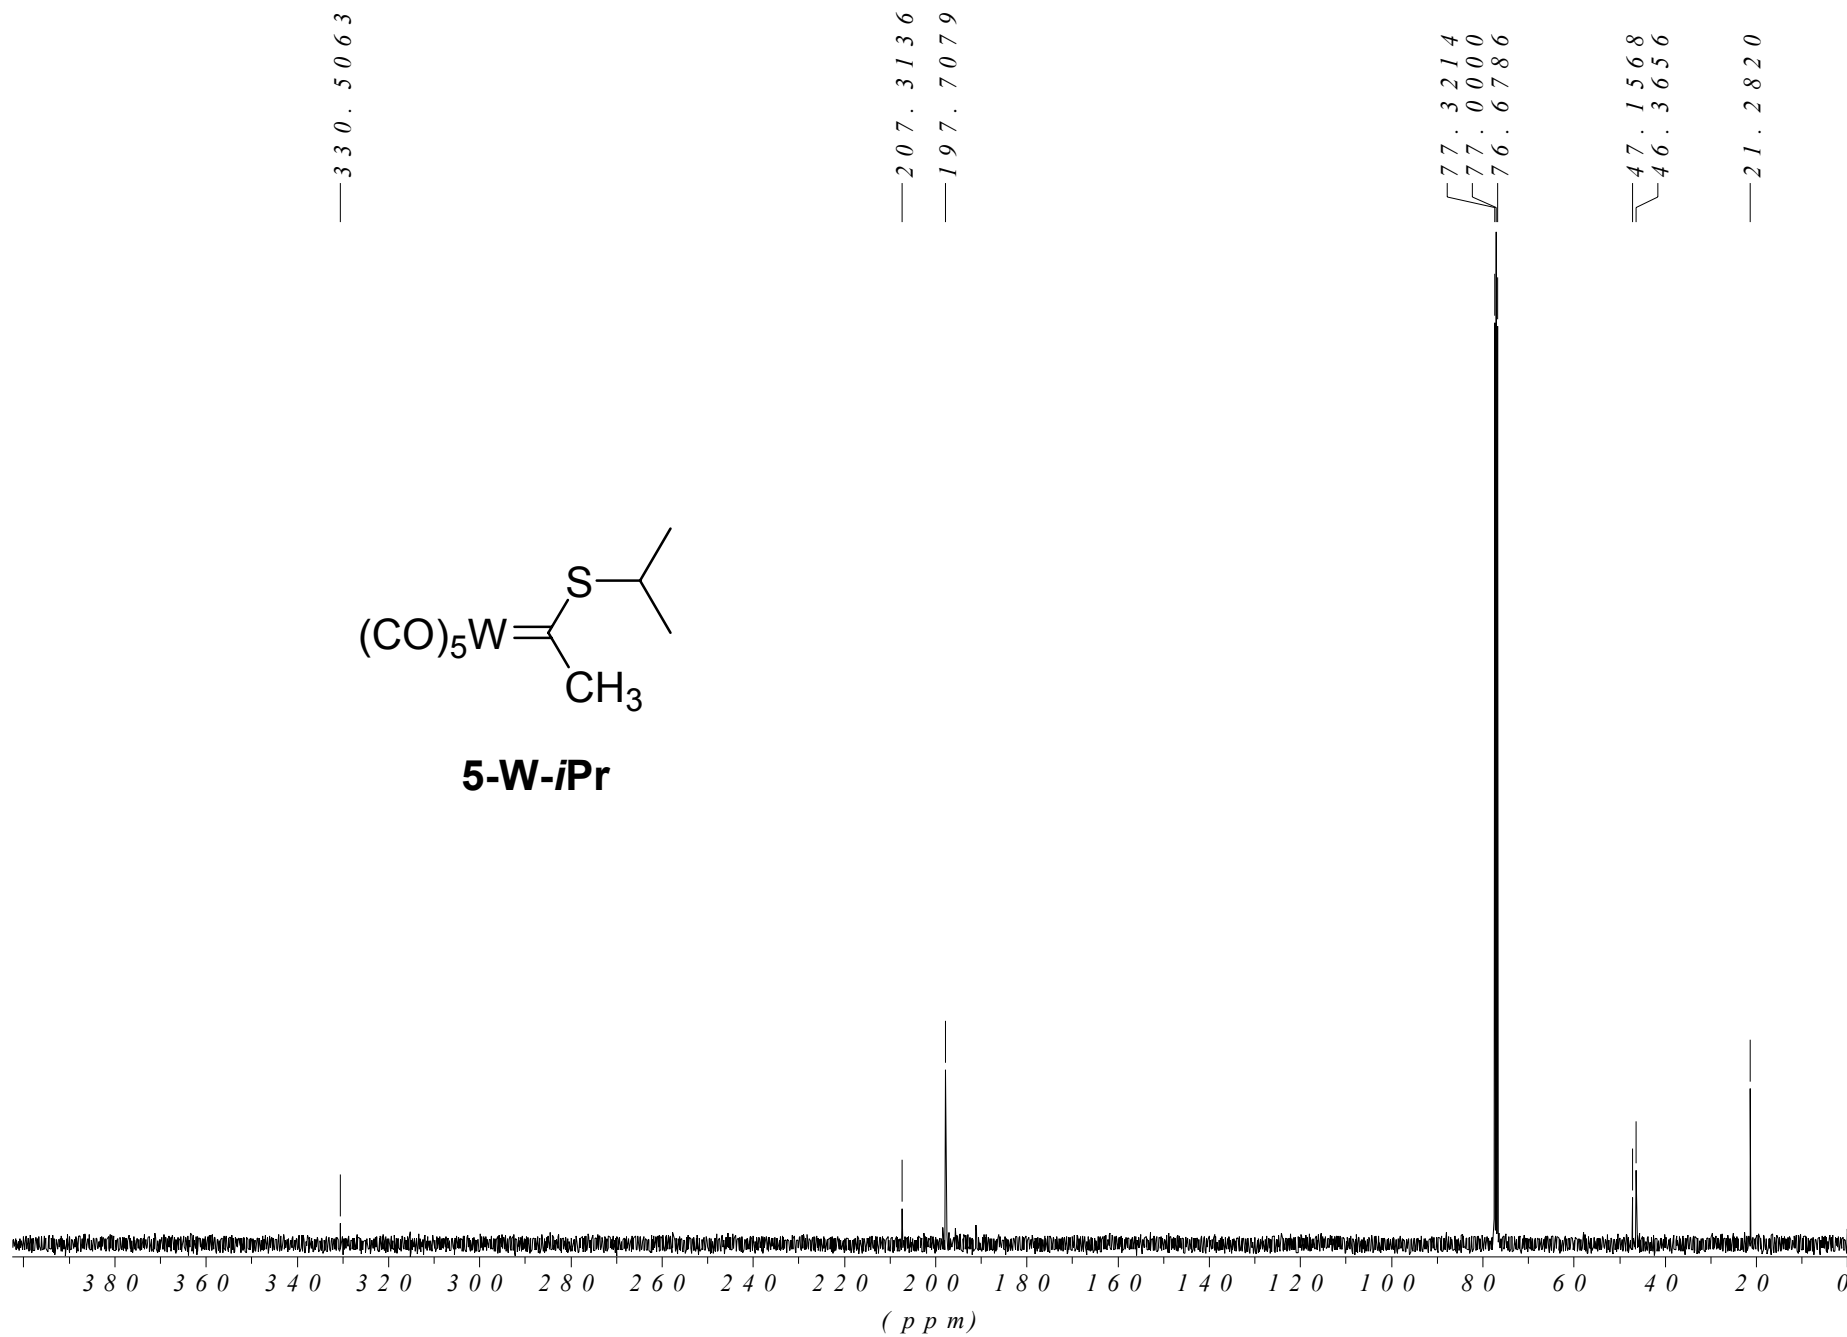

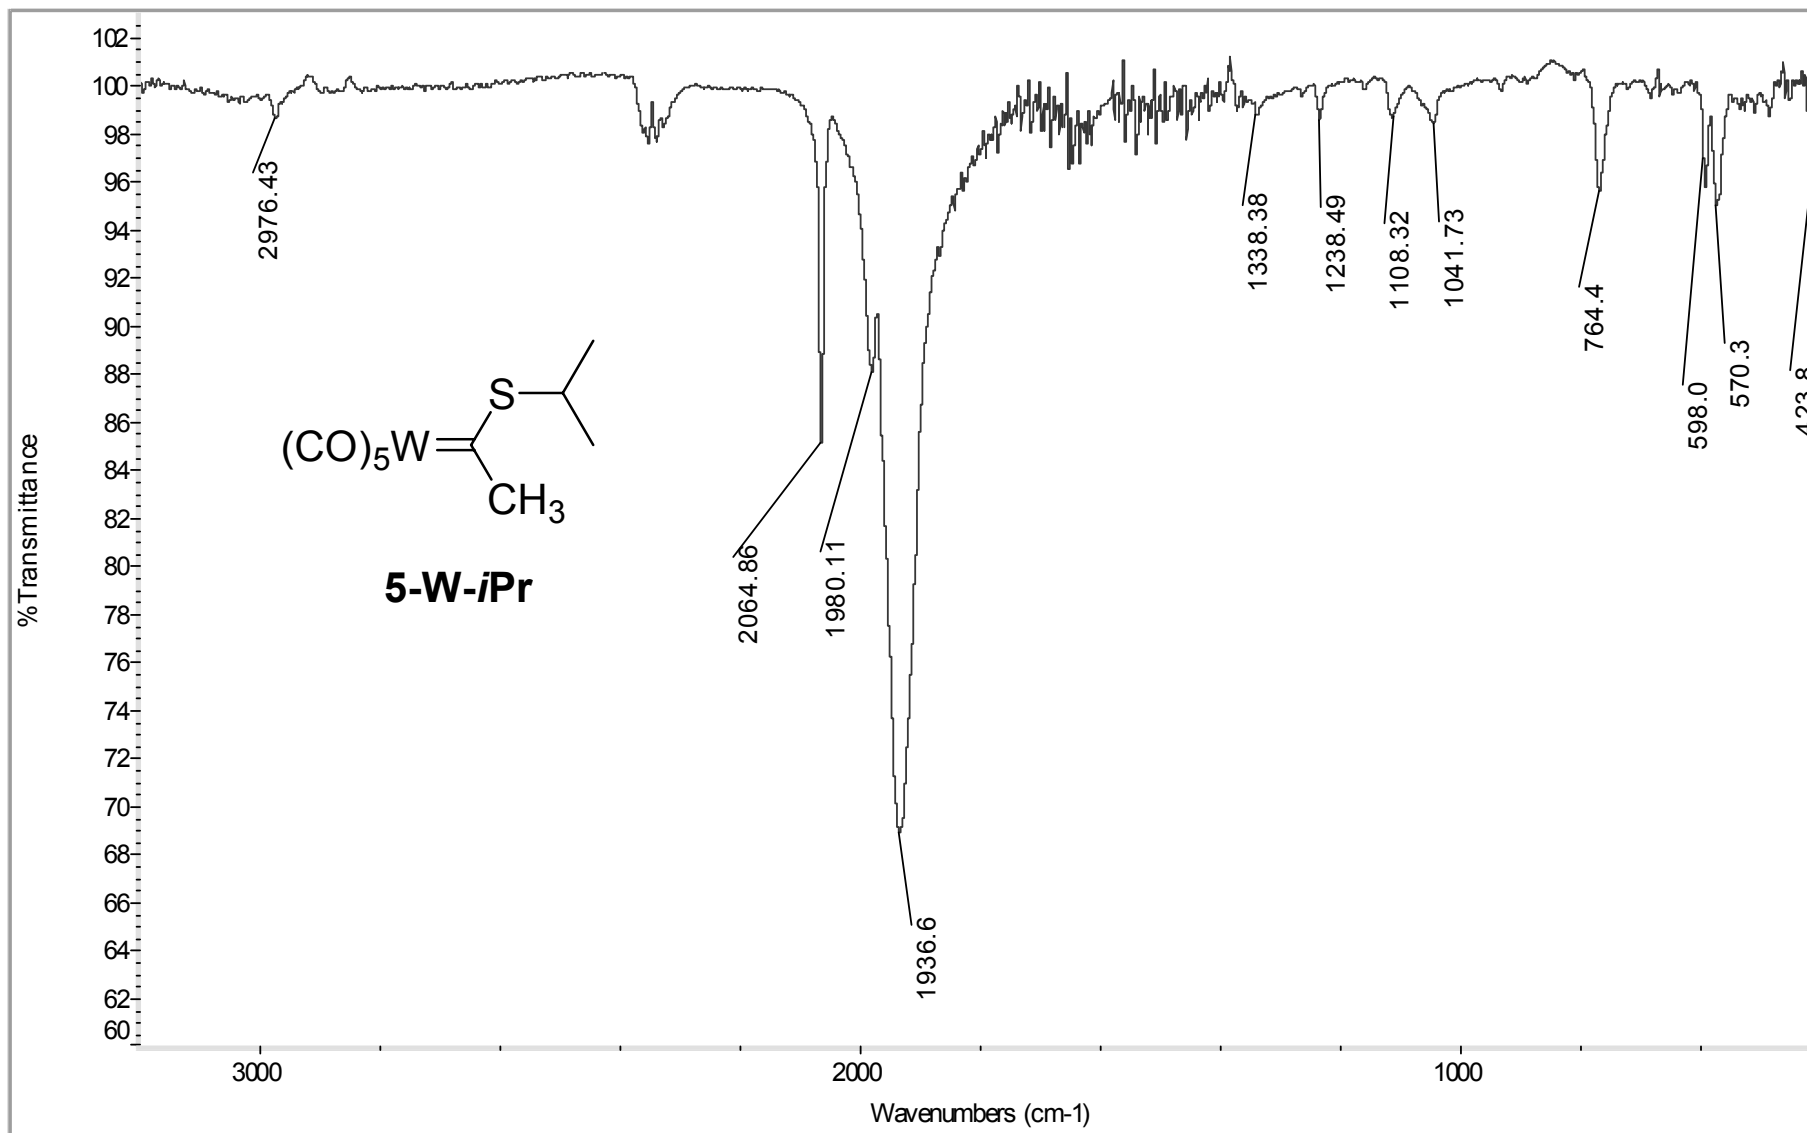



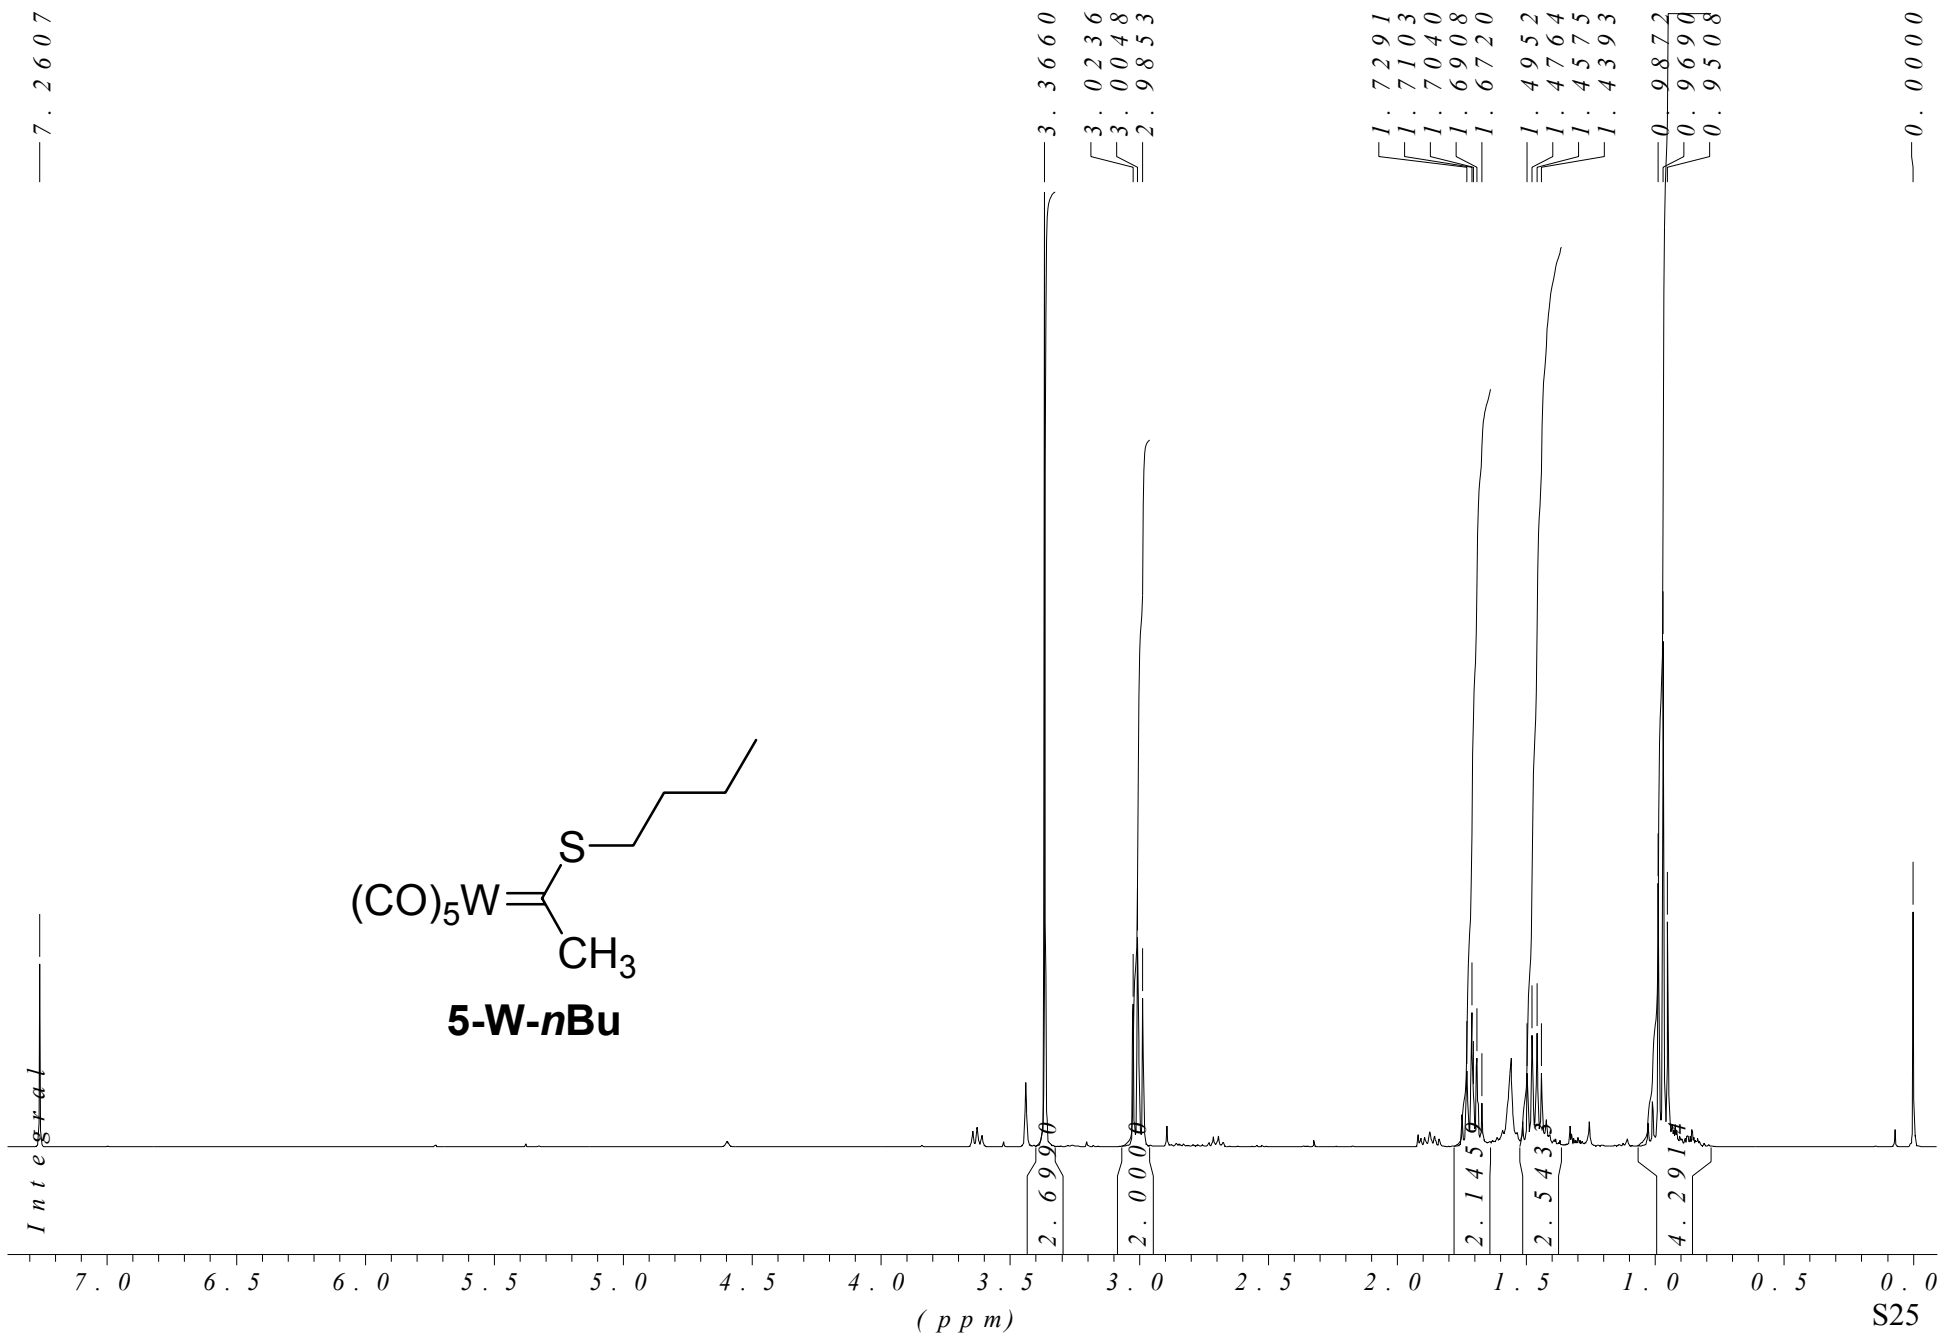

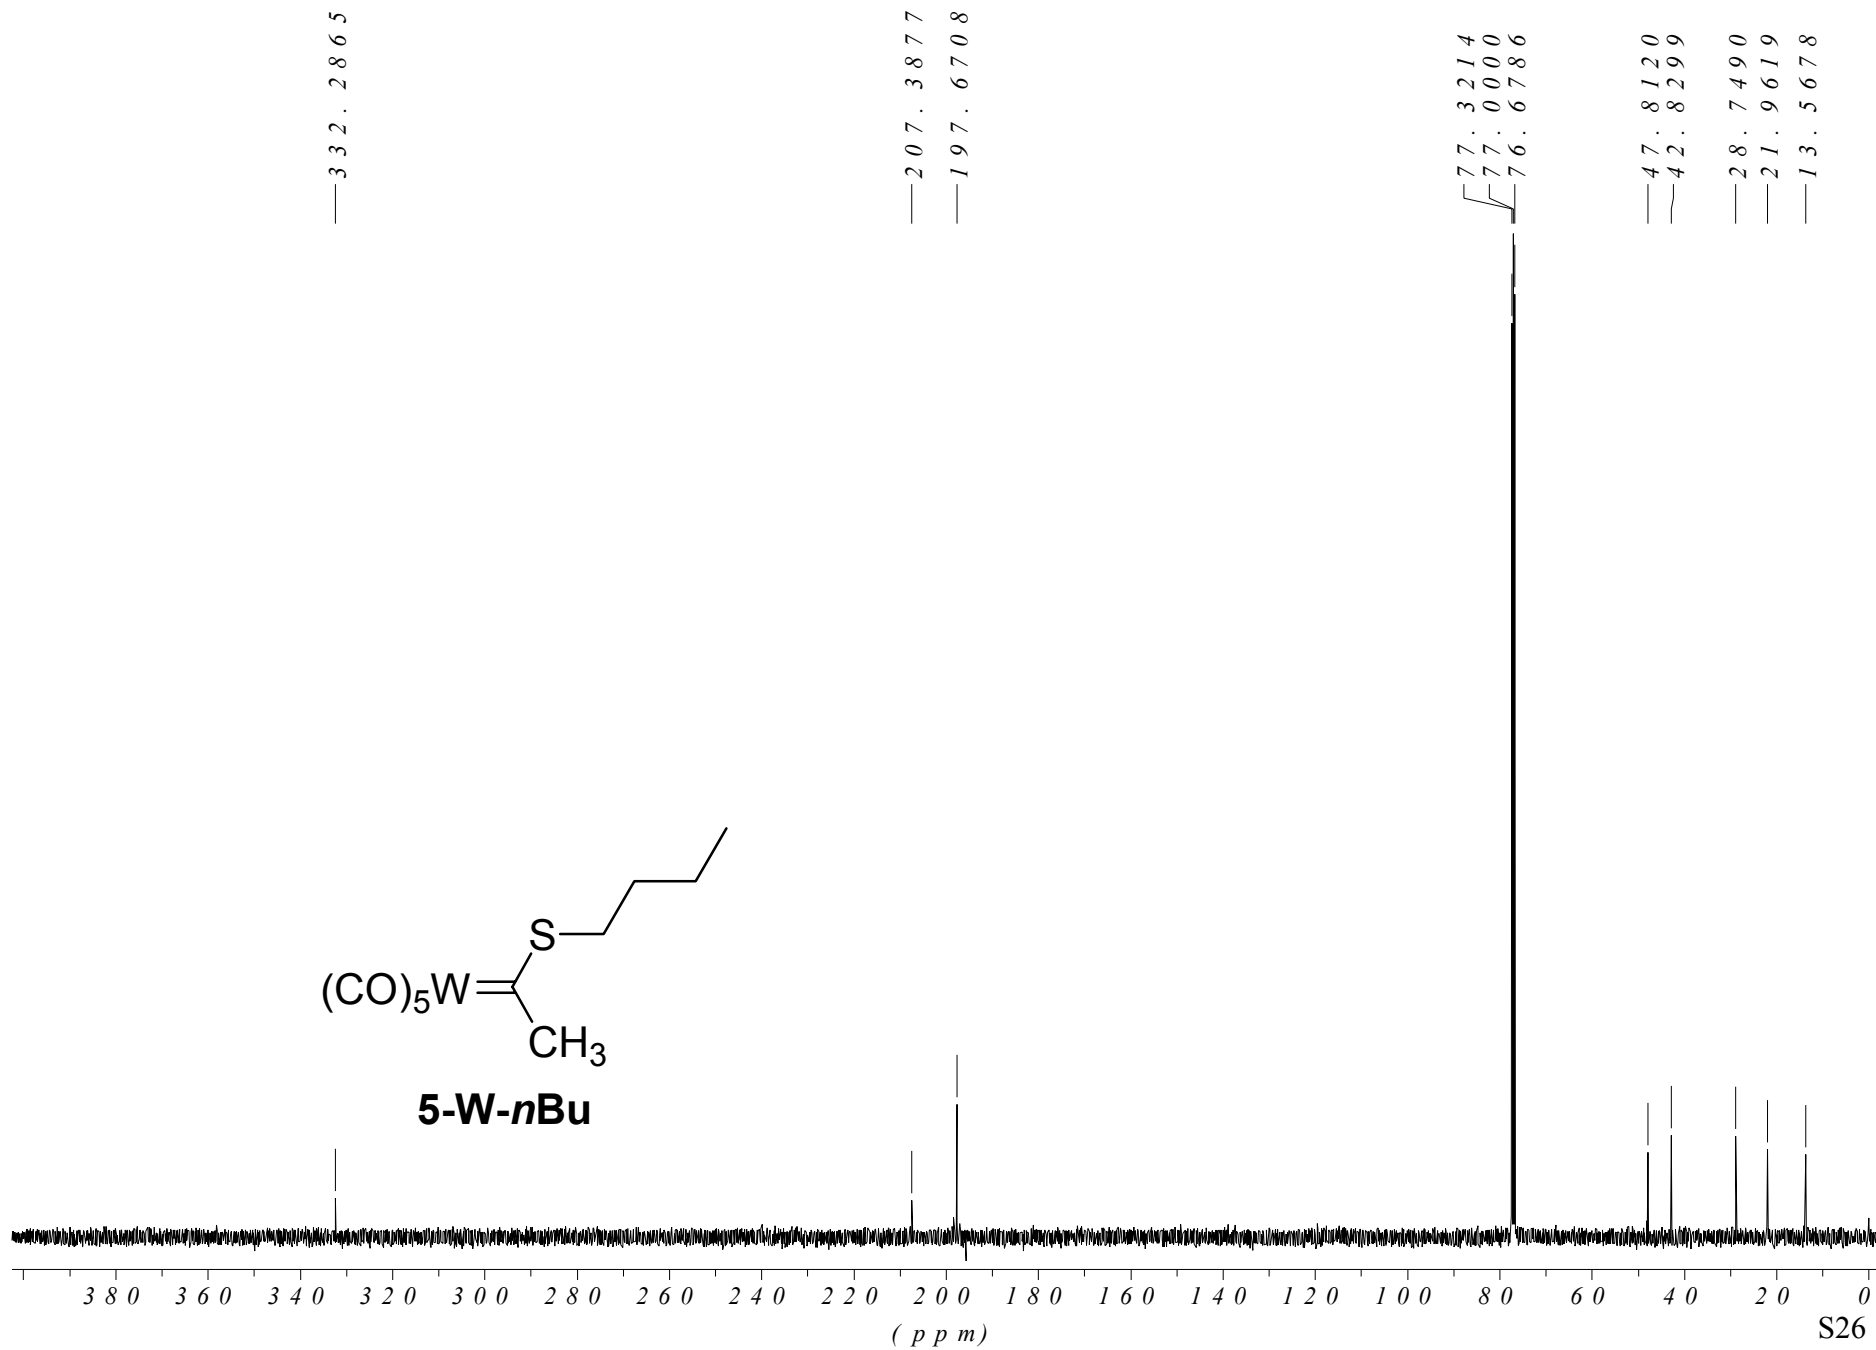

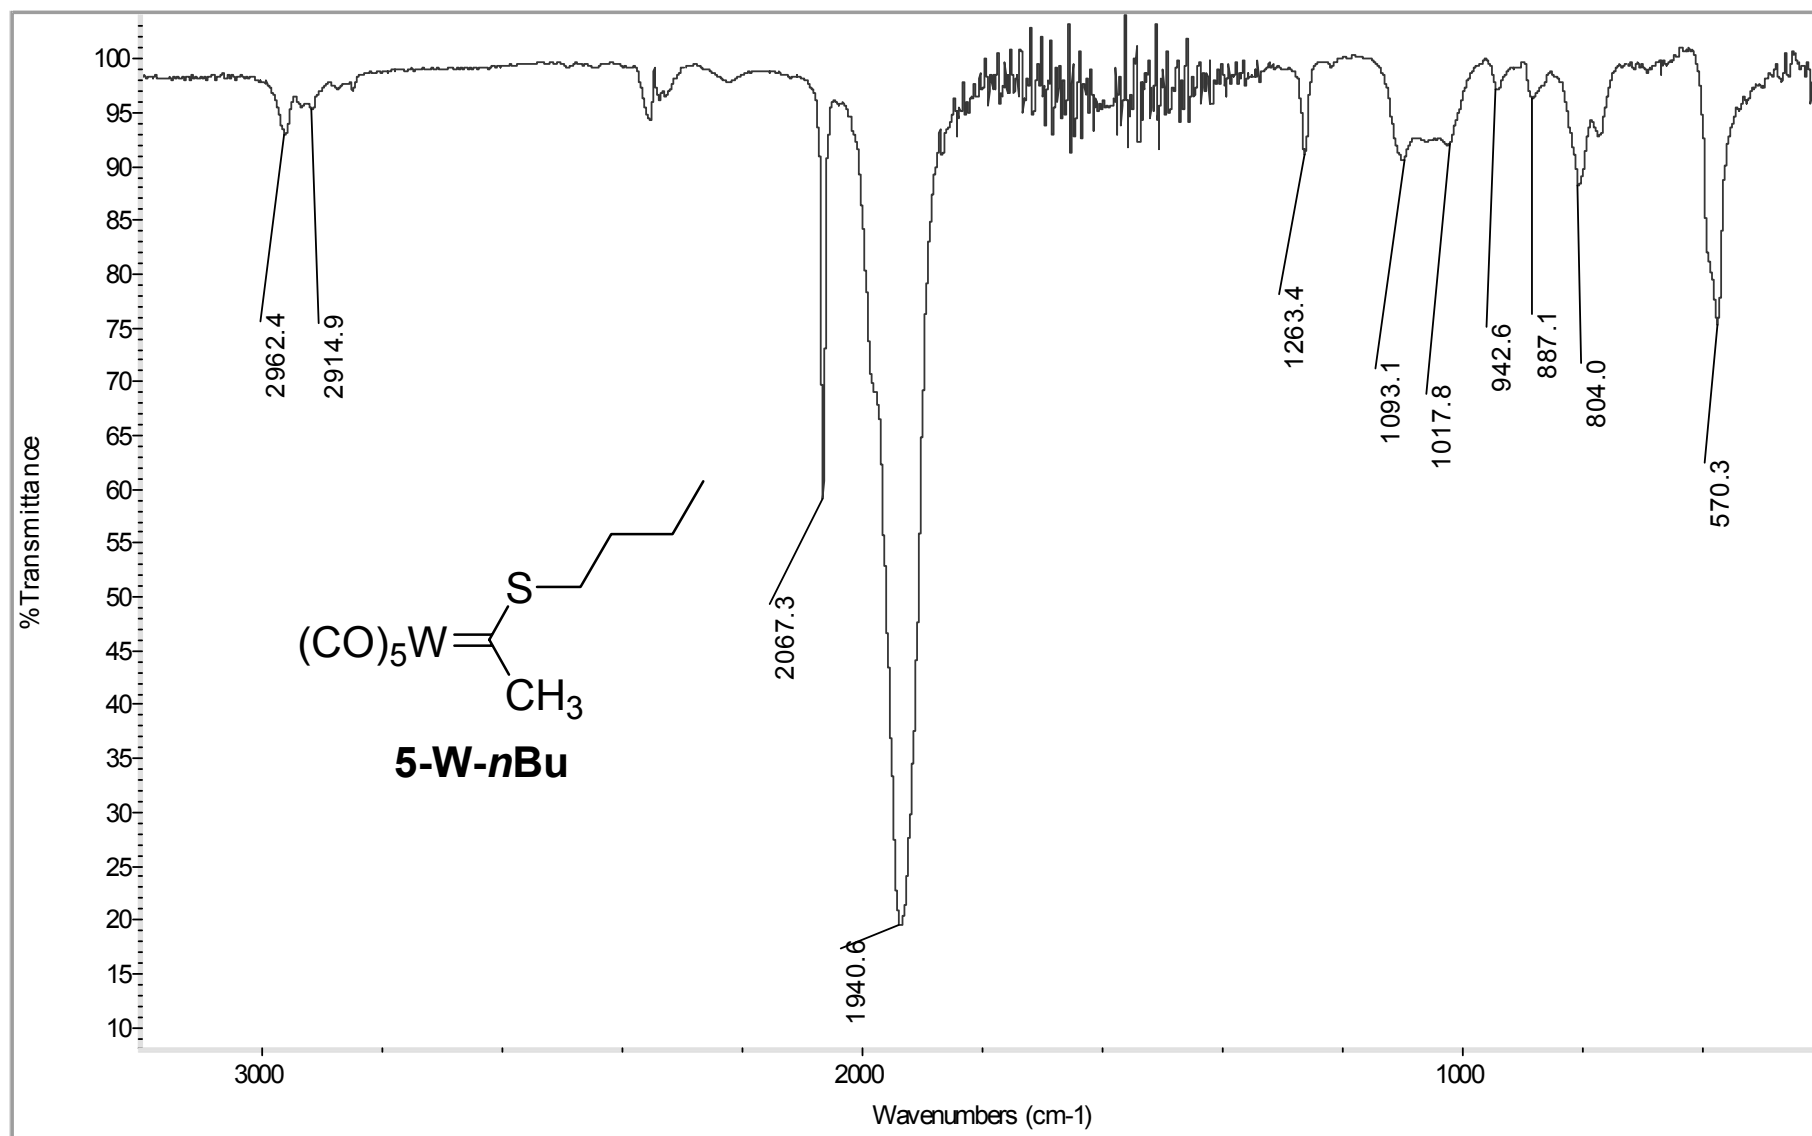

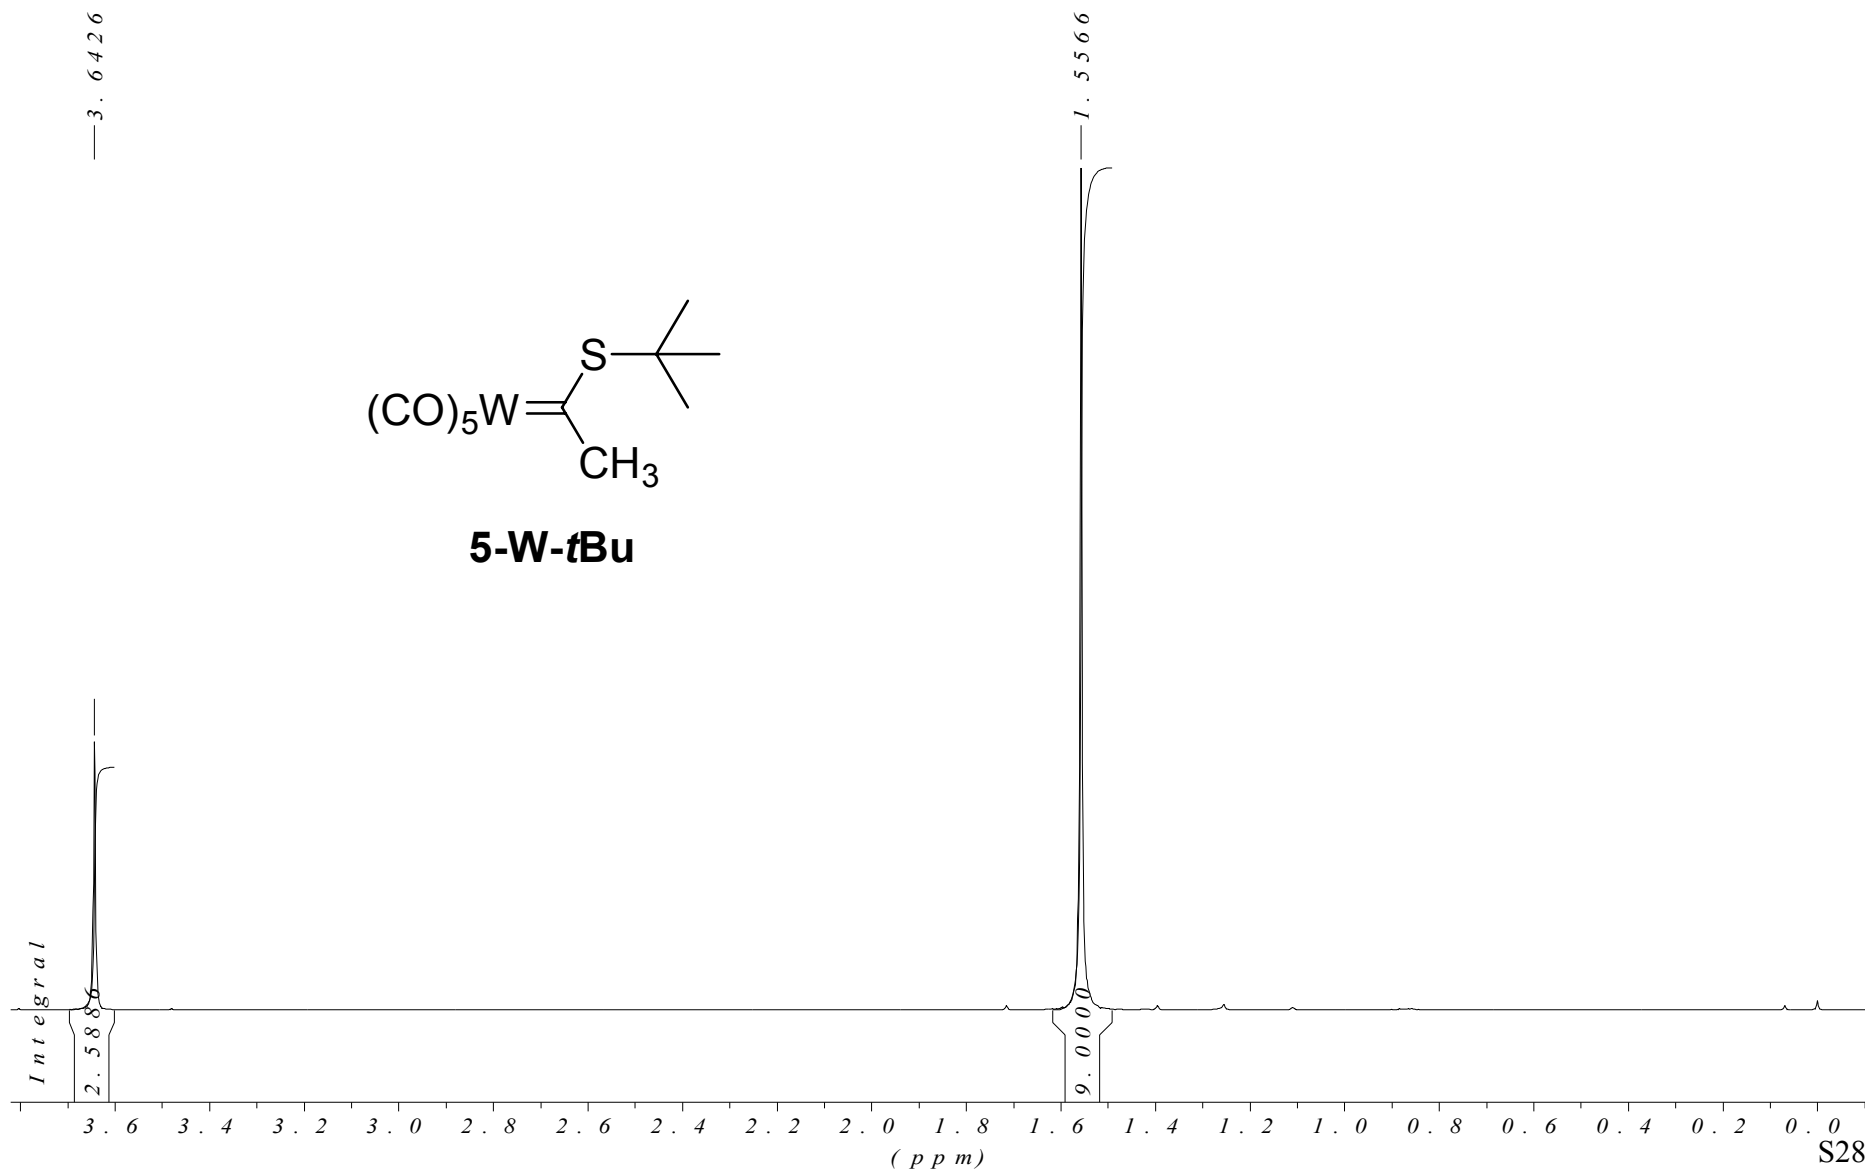

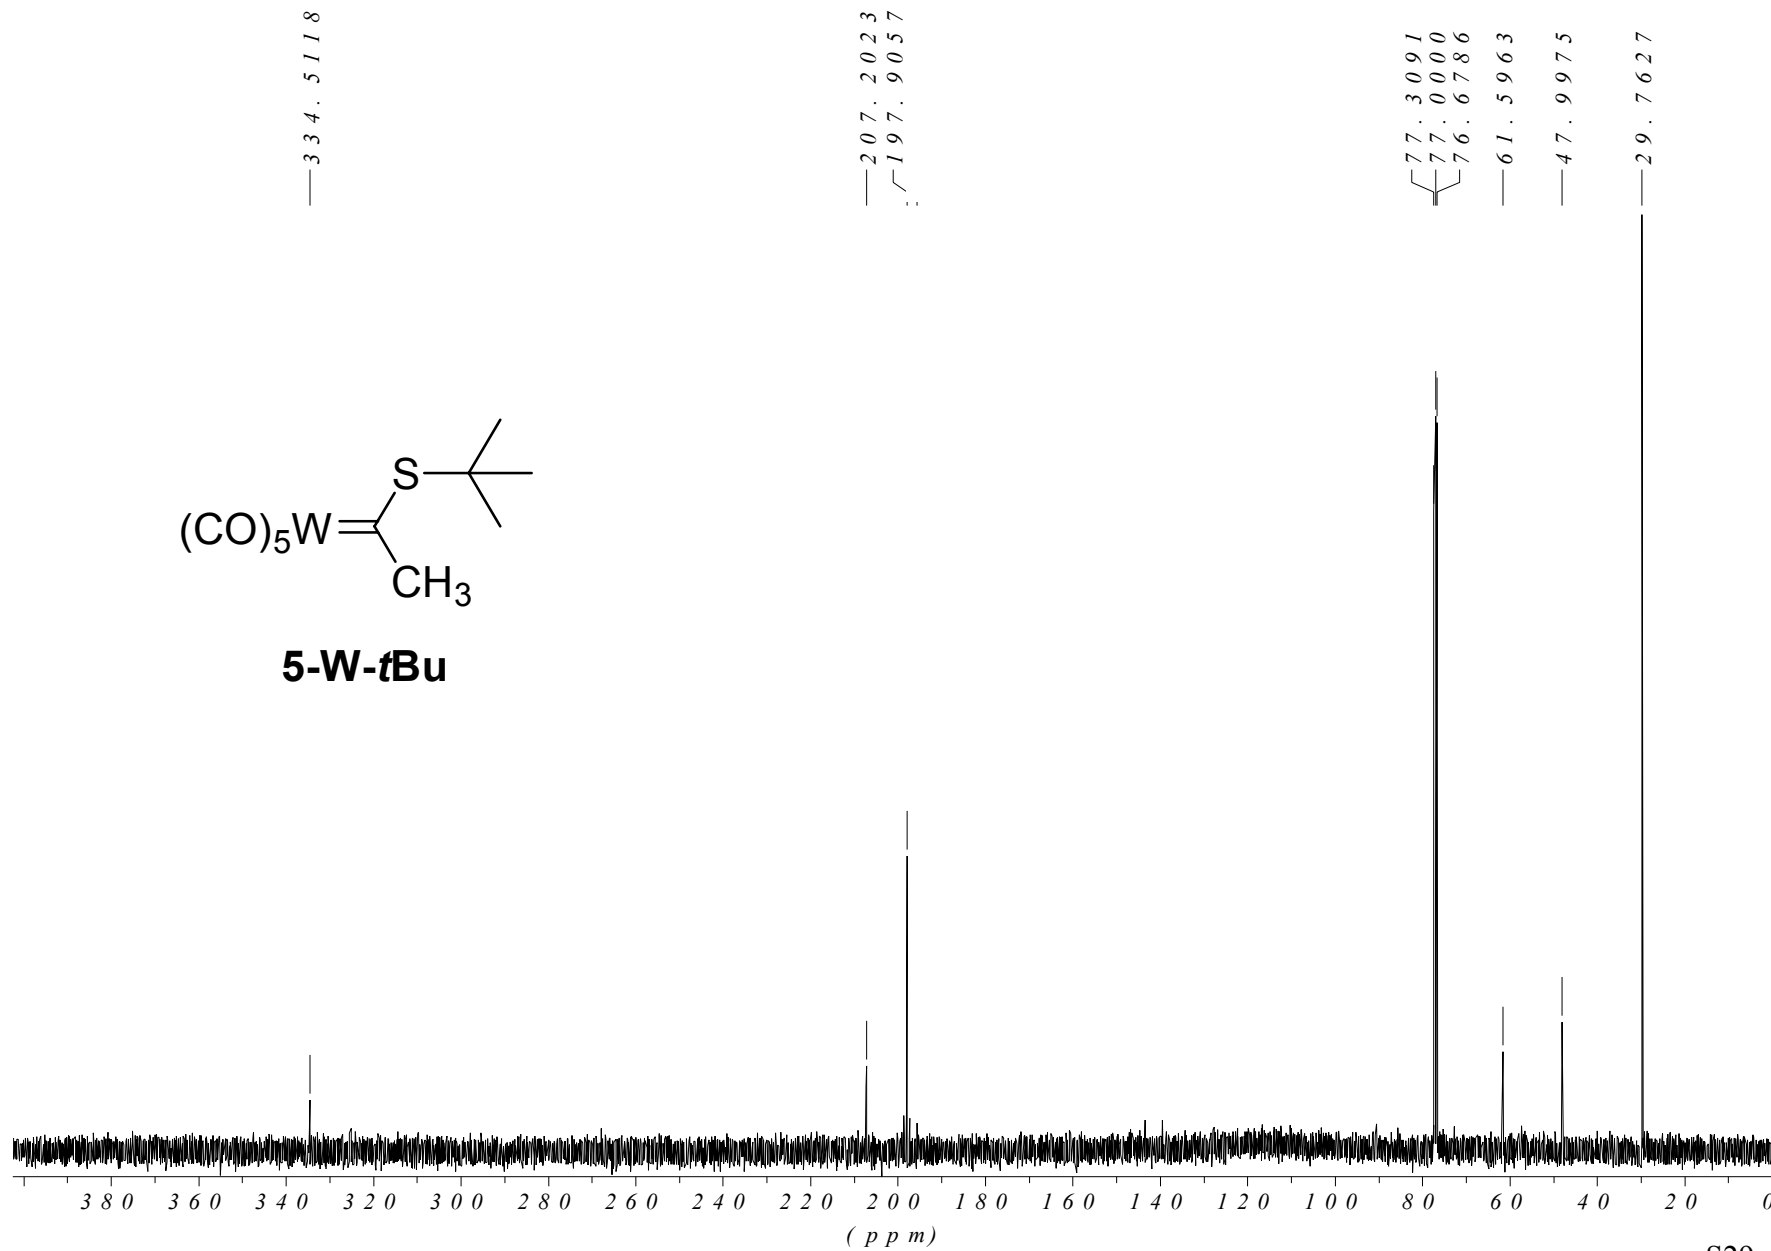

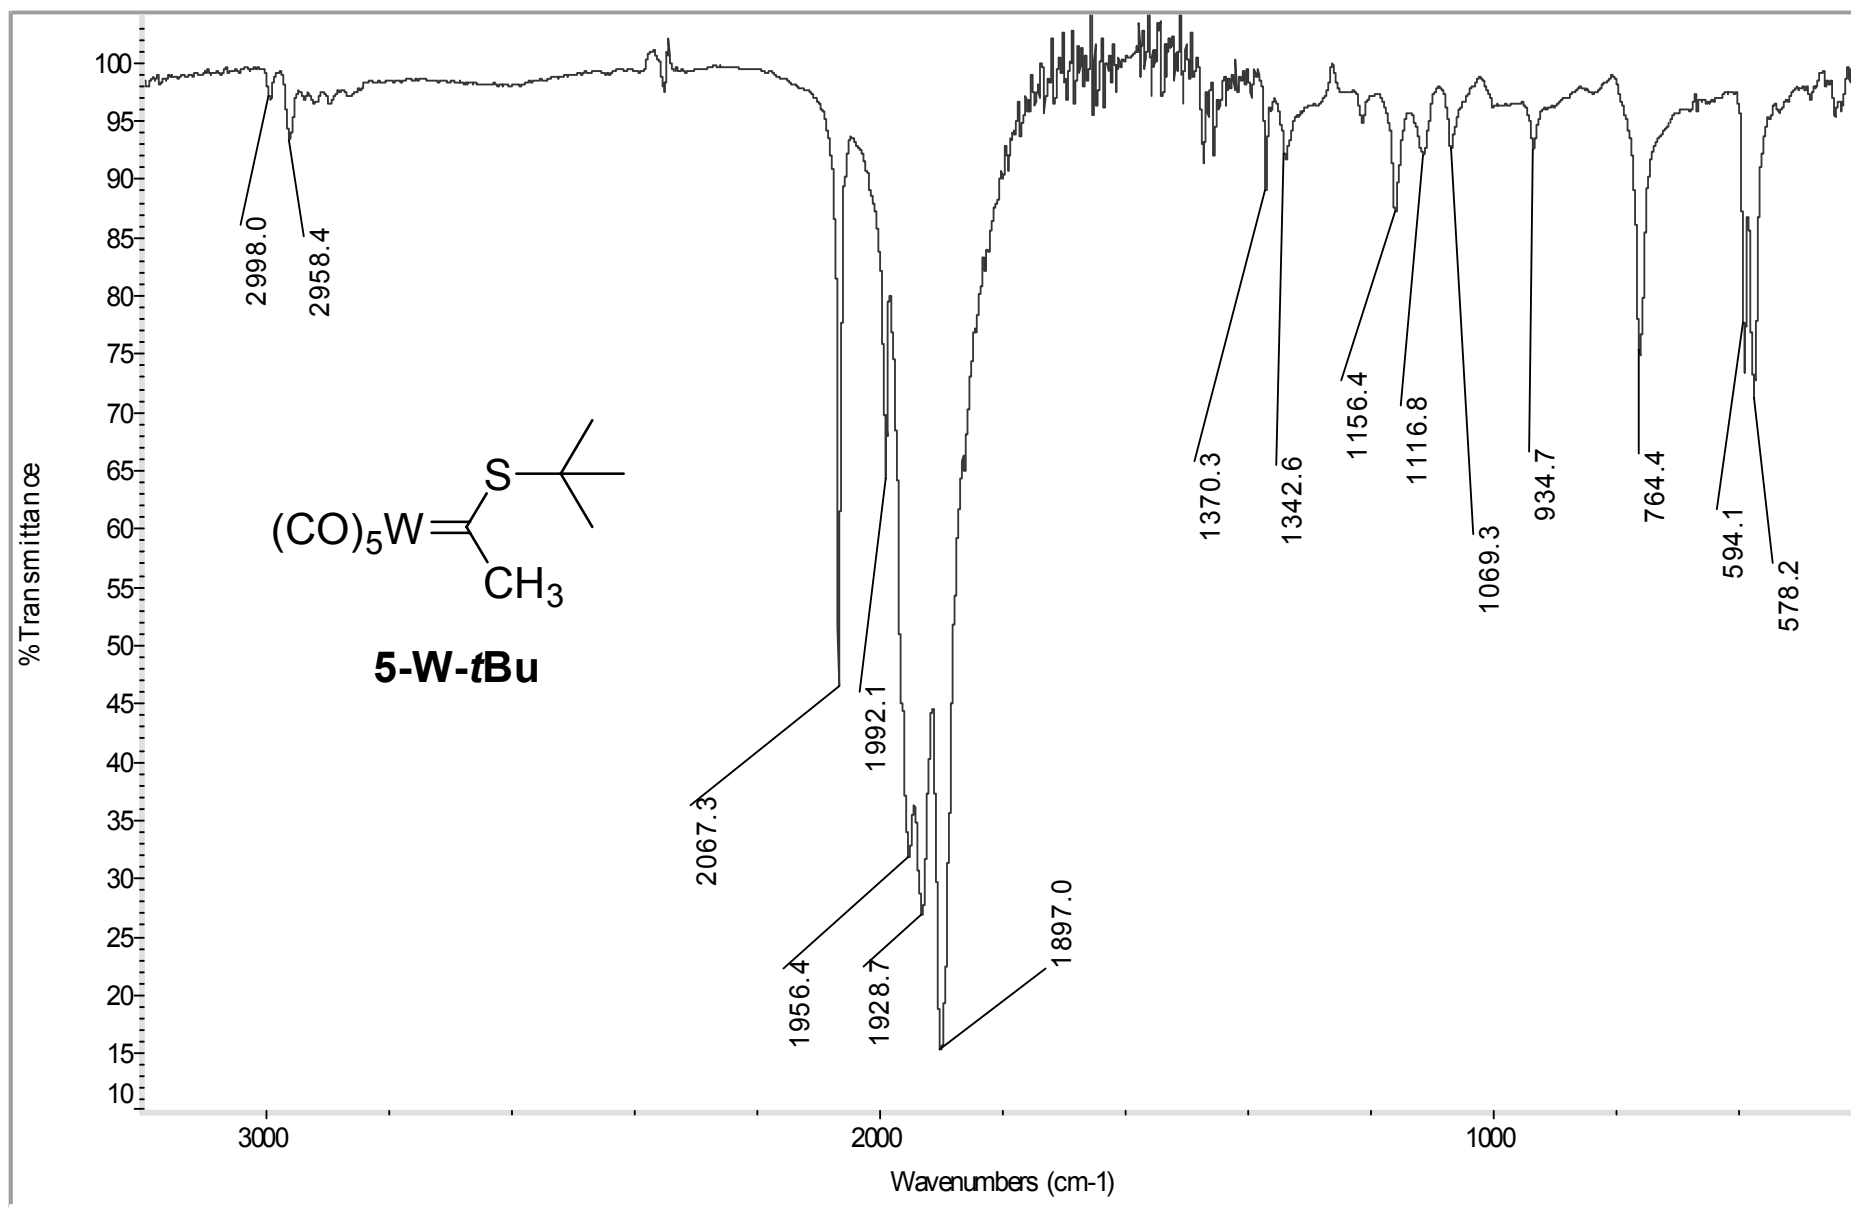

Supplement: b709504j.pdf [file b709504j.pdf]
